# Supplementary material for: Metal free C–O bond cleavage: a new strategy for the synthesis of substituted oxazoles
Source: Royal Society of Chemistry journal article supplement (doi:10.1039/d4ra05122j), 2024-01-01

# Supporting Information

## Metal free C–O bond cleavage: a new strategy for the synthesis of substituted oxazoles

Shengwang Li,<sup>a</sup> Guiqin Liu,<sup>a</sup> Zheyang Zhang,<sup>a</sup> Ruiling, Chen,<sup>b\*</sup> Haiying Tian,<sup>b\*</sup> Huifeng Wang,<sup>a\*</sup> Xiuling Chen<sup>a\*</sup>

<sup>a</sup>Hubei Key Laboratory of Radiation Chemistry and Functional Materials, Hubei University of Science and Technology, Xianning 437100, China

<sup>b</sup>School of Pharmacy, Changzhi Medical College, Changzhi, 046000, China

[Fax: (+86)-715-8338072; E-mail: cxl828800@163.com (Dr. X. L. Chen)]

### Contents

|                                                          |       |
|----------------------------------------------------------|-------|
| General remarks                                          | 2     |
| General procedure                                        | 2     |
| <sup>1</sup> H and <sup>13</sup> C NMR data of products  | 3-9   |
| References                                               | 9-10  |
| Copies of <sup>1</sup> H and <sup>13</sup> C NMR spectra | 11-34 |

## 1. General remarks

All non-aqueous reactions and manipulations were performed in air atmosphere. All solvents were purchased from Energy Chemical, Aladdin and used without further treatment. The reactions were monitored by GC (7820A, Hubei University of Science and Technology) and GC-MS (QP2010, Hunan University). The electron ionization (EI) method was used as the ionization method for the HRMS measurement, and the mass analyzer type is TOF for EI. The  $^1\text{H}$  NMR and  $^{13}\text{C}$  NMR spectra were recorded on a Bruker ADVANCE III spectrometer at 400 MHz and 100 MHz, respectively (Hubei University of Science and Technology). Flash column chromatography was performed using silica gel 40-70  $\mu\text{m}$  (200-300  $\mu\text{m}$ ). Amines and azide compounds were purchased from Energy Chemical and used without further treatment.

## 2. General procedure

A 10-mL Schlenk-type tube equipped with a magnetic stir bar was charged with substituted 2-oxo-2-phenylethyl acetate **1a-1l** (0.2 mmol), primary amine **2a-2m** (0.24 mmol),  $\text{K}_2\text{CO}_3$  (0.4 mmol),  $\text{I}_2$  (0.4 mmol), under  $\text{N}_2$  atmospheres, ethyl acetate (2 mL) was added at room temperature, and then the reaction mixture was stirred at 80  $^\circ\text{C}$  for 8 h, the reaction was monitored by GC or GC-MS. After completion of the reaction, the resulting solution was cooled to room temperature, and neutralized with saturated NaCl solution. The product was extracted with ethyl acetate, dried over anhydrous  $\text{Mg}_2\text{SO}_4$  and concentrated in vacuum. The crude product was purified by flash column chromatography on silica gel and eluted with ethyl acetate/Petroleum ether (1/5-1/10) give analytically pure product.

**Table S1** Optimization of the model reaction condition of bases<sup>a</sup>

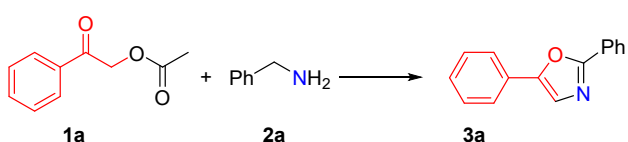

The reaction scheme shows the conversion of 1a and 2a to 3a. 1a is a substituted 2-oxo-2-phenylethyl acetate, 2a is benzylamine, and 3a is a 2-phenyl-1,2,4-oxadiazole derivative.

| Entry | Additive                      | Solvent       | <b>3a</b> <sup>%<sup>b</sup></sup> |
|-------|-------------------------------|---------------|------------------------------------|
| 1     | NaOH/ $\text{I}_2$            | ethyl acetate | 35%                                |
| 2     | KOH/ $\text{I}_2$             | ethyl acetate | 47%                                |
| 3     | $\text{NEt}_3$ / $\text{I}_2$ | ethyl acetate | trace                              |

|   |                                                  |               |     |
|---|--------------------------------------------------|---------------|-----|
| 4 | Na <sub>2</sub> CO <sub>3</sub> /I <sub>2</sub>  | ethyl acetate | 63% |
| 5 | Cs <sub>2</sub> CO <sub>3</sub> /I <sub>2</sub>  | ethyl acetate | 52% |
| 6 | C <sub>4</sub> H <sub>9</sub> OK /I <sub>2</sub> | ethyl acetate | 81% |
| 7 | K <sub>2</sub> CO <sub>3</sub> /I <sub>2</sub>   | ethyl acetate | 90% |

<sup>a</sup>Reaction conditions: 2-oxo-2-phenylethyl acetate **1a** (0.2 mmol), benzylamine **2a** (0.24 mmol), I<sub>2</sub> (0.4 mmol), base (0.4 mmol), ethyl acetate (2 mL), N<sub>2</sub> in 25 mL schlenk tube, 80 °C, 8 h. <sup>b</sup>Isolated yield.

### 3. <sup>1</sup>H NMR and <sup>13</sup>C NMR data of products

#### 2,5-diphenyloxazole (**3a**)<sup>1</sup>

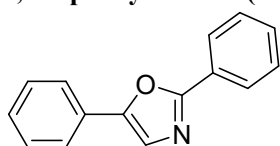

Following the general procedure (EtOAc/Petroleum ether 1:20), **3a** was obtained as a colorless solid, isolated yield: 88%, m.p. 66-68 °C. <sup>1</sup>H NMR (CDCl<sub>3</sub>, 400 MHz): δ 8.12 (q, 2H, *J* = 4.0 Hz), 7.71 (d, 2H, *J* = 7.6 Hz), 7.42-7.50 (m, 6H), 7.34 (t, 1H, *J* = 7.4 Hz); <sup>13</sup>C NMR (CDCl<sub>3</sub>, 100 MHz): δ 161.2, 151.3, 130.4, 128.9, 128.8, 128.5, 128.1, 127.5, 126.3, 124.2, 123.5; GC-MS: *m/z* = 221.25.

#### 5-phenyl-2-(p-tolyl)oxazole (**3b**)<sup>2</sup>

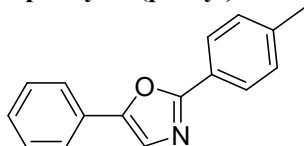

Following the general procedure (EtOAc/Petroleum ether 1:5), **3b** was obtained as a colorless solid, isolated yield: 85%, m.p. 71-73 °C. <sup>1</sup>H NMR (CDCl<sub>3</sub>, 400 MHz): δ 8.00 (d, 2H, *J* = 8.0 Hz), 7.71 (d, 2H, *J* = 7.6 Hz), 7.44 (t, 3H, *J* = 7.0 Hz), 7.33 (d, 1H, *J* = 7.6 Hz), 7.28 (d, 2H, *J* = 8.0 Hz), 2.41 (s, 3H); <sup>13</sup>C NMR (CDCl<sub>3</sub>, 100 MHz): δ 161.1, 151.0, 140.7, 129.6, 128.9, 128.3, 128.2, 126.3, 124.8, 124.2, 123.4, 21.6; GC-MS: *m/z* = 235.09.

#### 2-(4-methoxyphenyl)-5-phenyloxazole (**3c**)<sup>1</sup>

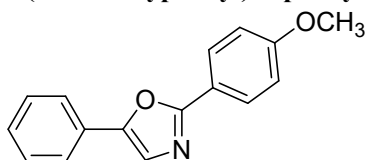

Following the general procedure (EtOAc/Petroleum ether 1:5), **3c** was obtained as a colorless solid, isolated yield: 84%, m.p. 78-79 °C. <sup>1</sup>H NMR (CDCl<sub>3</sub>, 400 MHz): δ 7.71 (t, 3H, *J* = 6.6 Hz), 7.64 (s, 1H), 7.34-7.46 (m, 5H), 7.00 (q, 1H, *J* = 4.2 Hz), 3.89 (s, 3H); <sup>13</sup>C NMR (CDCl<sub>3</sub>, 100 MHz): δ 161.1, 159.9, 151.3, 129.9, 128.9, 128.7, 128.5, 128.0, 124.2, 123.4, 118.8, 116.9, 111.0, 55.5; GC-MS: *m/z* = 251.09.

### 2-(4-nitrophenyl)-5-phenyloxazole (3d)<sup>3</sup>

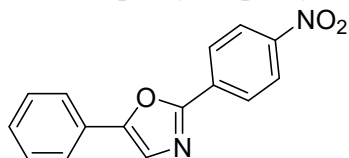

Following the general procedure (EtOAc/Petroleum ether 1:5), **3d** was obtained as a colorless solid, isolated yield: 81%, m.p. 209-213 °C. <sup>1</sup>H NMR (CDCl<sub>3</sub>, 400 MHz): δ 8.34 (d, 2H, *J* = 9.2 Hz), 8.13-8.15 (m, 2H), 7.86 (d, 2H, *J* = 8.8 Hz), 7.66 (s, 1H), 7.52 (t, 3H, *J* = 3.2 Hz); <sup>13</sup>C NMR (CDCl<sub>3</sub>, 100 MHz): δ 162.8, 149.1, 147.2, 133.8, 131.1, 129.0, 126.9, 126.8, 126.7, 124.6, 124.5; GC-MS: *m/z* = 266.25.

### 2-(4-bromophenyl)-5-phenyloxazole (3e)<sup>4</sup>

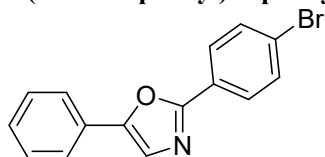

Following the general procedure (EtOAc/Petroleum ether 1:5), **3e** was obtained as a colorless solid, isolated yield: 79%, m.p. 100-102 °C. <sup>1</sup>H NMR (CDCl<sub>3</sub>, 400 MHz): δ 7.94 (d, 2H, *J* = 8.8 Hz), 7.69 (d, 2H, *J* = 7.6 Hz), 7.69 (d, 2H, *J* = 8.8 Hz), 7.41-7.45 (m, 3H), 7.34 (t, 1H, *J* = 7.4 Hz); <sup>13</sup>C NMR (CDCl<sub>3</sub>, 100 MHz): δ 171.1, 160.3, 151.6, 132.1, 128.9, 128.6, 127.8, 127.7, 126.4, 124.8, 124.2, 123.6; GC-MS: *m/z* = 298.99.

### 2-(4-chlorophenyl)-5-phenyloxazole (3f)<sup>5</sup>

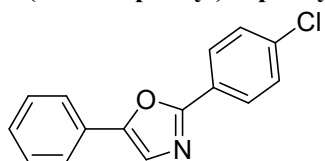

Following the general procedure (EtOAc/Petroleum ether 1:5), **3f** was obtained as a colorless solid, isolated yield: 80%, m.p. 103-105 °C. <sup>1</sup>H NMR (CDCl<sub>3</sub>, 400 MHz): δ 8.04 (d, 2H, *J* = 8.8 Hz), 7.71 (d, 2H, *J* = 7.6 Hz), 7.42-7.56 (m, 5H), 7.34 (t, 1H, *J* = 7.4 Hz); <sup>13</sup>C NMR (CDCl<sub>3</sub>, 100 MHz): δ 160.2, 151.6, 136.4, 129.1, 128.9, 128.6, 127.9, 127.5, 125.9, 124.3, 123.6; GC-MS: *m/z* = 255.04.

### 2-(naphthalen-2-yl)-5-phenyloxazole (3g)<sup>2</sup>

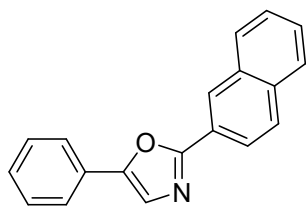

Following the general procedure (EtOAc/Petroleum ether 1:5), **3i** was obtained as a colorless solid, isolated yield: 85%, m.p. 99-102 °C. <sup>1</sup>H NMR (CDCl<sub>3</sub>, 400 MHz): δ 8.60 (s, 1H), 8.19 (d, 1H, *J* = 8.4 Hz), 7.77-7.93 (m, 5H), 7.47-7.56 (m, 5H), 7.38 (t, 1H, *J* = 7.2

Hz);  $^{13}\text{C}$  NMR ( $\text{CDCl}_3$ , 100 MHz):  $\delta$  161.4, 151.5, 134.2, 133.1, 128.9, 128.73, 128.71, 128.5, 128.1, 127.9, 127.3, 126.8, 126.2, 124.8, 124.3, 123.6, 123.2; GC-MS:  $m/z$  = 271.09.

#### 5-phenyl-2-(thiophen-2-yl)oxazole (**3h**)<sup>5</sup>

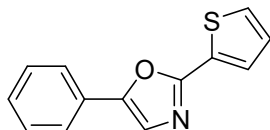

Following the general procedure (EtOAc/Petroleum ether 1:5), **3g** was obtained as a colorless solid, isolated yield: 78%, m.p. 72-74 °C.  $^1\text{H}$  NMR ( $\text{CDCl}_3$ , 400 MHz):  $\delta$  7.74 (d, 1H,  $J$  = 3.6 Hz), 7.71 (d, 2H,  $J$  = 7.6 Hz), 7.42-7.46 (m, 3H), 7.36 (s, 1H), 7.34 (t, 1H,  $J$  = 7.4 Hz), 7.14 (q, 1H,  $J$  = 4.4 Hz);  $^{13}\text{C}$  NMR ( $\text{CDCl}_3$ , 100 MHz):  $\delta$  157.4, 150.9, 130.1, 128.9, 128.5, 128.3, 127.9, 127.8, 127.6, 124.2, 123.3; GC-MS:  $m/z$  = 227.04.

#### 5-phenyl-2-(pyridin-3-yl)oxazole (**3i**)<sup>1</sup>

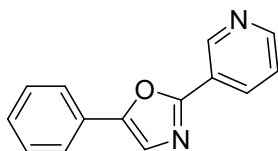

Following the general procedure (EtOAc/Petroleum ether 1:5), **3h** was obtained as a colorless solid, isolated yield: 81%, m.p. 77-79 °C.  $^1\text{H}$  NMR ( $\text{CDCl}_3$ , 400 MHz):  $\delta$  9.35 (d, 1H,  $J$  = 1.2 Hz), 8.69 (d, 1H,  $J$  = 3.2 Hz), 8.36 (d, 1H,  $J$  = 8.0 Hz), 7.73 (d, 2H,  $J$  = 7.6 Hz), 7.36-7.49 (m, 5H);  $^{13}\text{C}$  NMR ( $\text{CDCl}_3$ , 100 MHz):  $\delta$  158.7, 152.1, 150.9, 147.5, 133.5, 129.0, 128.9, 127.6, 124.4, 123.8, 123.7; GC-MS:  $m/z$  = 238.11.

#### 2-(3-methoxyphenyl)-5-phenyloxazole (**3j**)<sup>6</sup>

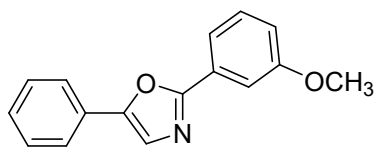

Following the general procedure (EtOAc/Petroleum ether 1:5), **3j** was obtained as a colorless solid, isolated yield: 80%, m.p. 81-84 °C.  $^1\text{H}$  NMR ( $\text{CDCl}_3$ , 400 MHz):  $\delta$  7.71 (t, 2H,  $J$  = 6.6 Hz), 7.64 (s, 1H), 7.34-7.46 (m, 5H), 7.00 (q, 1H,  $J$  = 8.4 Hz);  $^{13}\text{C}$  NMR ( $\text{CDCl}_3$ , 100 MHz):  $\delta$  161.1, 159.9, 151.3, 129.9, 128.9, 128.7, 128.5, 128.0, 124.2, 123.4, 118.8, 116.9, 111.0, 55.5; GC-MS:  $m/z$  = 251.09.

#### diphenyl benzylphosphoramidate (**3k**)<sup>3</sup>

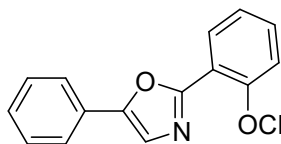

Following the general procedure (EtOAc/Petroleum ether 1:5), **3j** was obtained as a colorless solid, isolated yield: 74%, m.p. 77-79 °C. <sup>1</sup>H NMR (CDCl<sub>3</sub>, 400 MHz): δ 7.74 (t, 2H, *J* = 6.6 Hz), 7.65 (s, 1H), 7.33-7.47 (m, 5H), 7.01 (q, 1H, *J* = 8.4 Hz); <sup>13</sup>C NMR (CDCl<sub>3</sub>, 100 MHz): δ 161.1, 159.9, 151.4, 130.0, 129.0, 128.7, 128.5, 128.0, 124.3, 123.5, 118.8, 116.9, 111.0, 55.5; GC-MS: *m/z* = 251.09.

### 2-benzyl-5-phenyloxazole (**3l**)<sup>2</sup>

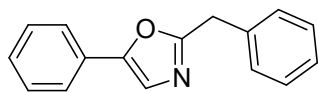

Following the general procedure (EtOAc/Petroleum ether 1:10), **3l** was obtained as a colorless solid, isolated yield: 70%, m.p. 71-72°C. <sup>1</sup>H NMR (CDCl<sub>3</sub>, 400 MHz): δ 8.31 (d, 2H, *J* = 7.2 Hz), 7.47 (t, 2H, *J* = 7.6 Hz), 7.24-7.49 (m, 7H), 4.18 (s, 2H); <sup>13</sup>C NMR (CDCl<sub>3</sub>, 100 MHz): δ 167.7, 138.3, 125.5, 134.4, 131.2, 128.83, 128.75, 127.1, 126.8, 124.1, 122.0, 40.6; GC-MS: *m/z* = 235.09.

### 2-ethyl-5-phenyloxazole (**3m**)<sup>1</sup>

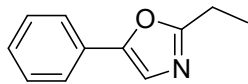

Following the general procedure (EtOAc/Petroleum ether 1:10), **3m** was obtained as a colorless liquid, isolated yield: 71%. <sup>1</sup>H NMR (CDCl<sub>3</sub>, 400 MHz): δ 7.75 (d, 2H, *J* = 7.2 Hz), 7.34 (t, 2H, *J* = 7.6 Hz), 7.19 (t, 1H, *J* = 7.4 Hz), 7.09 (s, 1H); <sup>13</sup>C NMR (CDCl<sub>3</sub>, 100 MHz): δ 149.7, 139.9, 134.5, 128.5, 126.3, 124.7, 114.7, 20.3, 11.2; GC-MS: *m/z* = 173.08.

### 2-phenyl-5-(p-tolyl)oxazole (**3n**)<sup>1</sup>

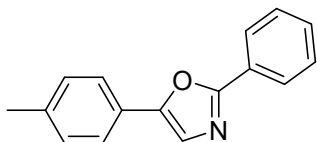

Following the general procedure (EtOAc/Petroleum ether 1:10), **3n** was obtained as a colorless solid, isolated yield: 85%, m.p. 69-71 °C. <sup>1</sup>H NMR (CDCl<sub>3</sub>, 400 MHz): δ 8.12 (d, 2H, *J* = 8.0 Hz), 7.60 (d, 2H, *J* = 8.0 Hz), 7.45-7.50 (m, 3H), 7.39 (s, 1H), 7.24 (d, 2H, *J* = 7.6 Hz), 2.39 (s, 3H); <sup>13</sup>C NMR (CDCl<sub>3</sub>, 100 MHz): δ 160.9, 151.5, 138.5, 130.2, 129.6, 128.8, 127.6, 126.2, 125.3, 124.2, 122.8, 21.4; GC-MS: *m/z* = 235.09.

### 5-(4-methoxyphenyl)-2-phenyloxazole (**3o**)<sup>1</sup>

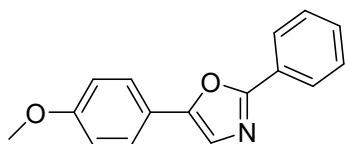

Following the general procedure (EtOAc/Petroleum ether 1:10), **3o** was obtained as a colorless solid, isolated yield: 84%, m.p. 88-89 °C. <sup>1</sup>H (CDCl<sub>3</sub>, 400 MHz): δ 8.10 (d, 2H, *J* = 6.4 Hz), 7.64 (d, 2H, *J* = 8.8 Hz), 7.42-7.49 (m, 3H), 7.32 (s, 1H), 6.97 (d, 2H, *J* = 8.8 Hz), 3.86 (s, 3H); <sup>13</sup>C NMR (CDCl<sub>3</sub>, 100 MHz): δ 160.6, 159.9, 151.4, 130.1, 128.8, 127.7, 126.2, 125.8, 122.0, 121.0, 114.5, 55.4; GC-MS: *m/z* = 251.09.

#### 5-(4-nitrophenyl)-2-phenyloxazole (**3p**)<sup>7</sup>

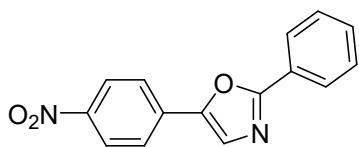

Following the general procedure (EtOAc/Petroleum ether 1:10), **3p** was obtained as a colorless solid, isolated yield: 89%, m.p. 112-115 °C. <sup>1</sup>H NMR (CDCl<sub>3</sub>, 400 MHz): δ 8.31 (d, 2H, *J* = 9.2 Hz), 8.13-8.15 (m, 2H), 7.86 (d, 2H, *J* = 8.8 Hz), 7.66 (s, 1H), 7.52 (d, 3H, *J* = 3.2 Hz); <sup>13</sup>C NMR (CDCl<sub>3</sub>, 100 MHz): δ 162.8, 149.1, 147.2, 133.8, 131.1, 129.0, 126.9, 126.8, 126.7, 124.6, 124.5; GC-MS: *m/z* = 266.06.

#### 2-phenyl-5-(4-(trifluoromethyl)phenyl)oxazole (**3q**)<sup>1</sup>

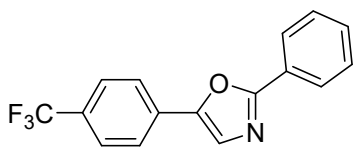

Following the general procedure (EtOAc/Petroleum ether 1:10), **3q** was obtained as a colorless solid, isolated yield: 74%, m.p. 203-205 °C. <sup>1</sup>H NMR (CDCl<sub>3</sub>, 400 MHz): δ 8.12 (q, 2H, *J* = 3.8 Hz), 7.81 (d, 2H, *J* = 8.0 Hz), 7.69 (d, 2H, *J* = 8.0 Hz), 7.56 (s, 1H), 7.49 (q, 3H, *J* = 2.4 Hz); <sup>13</sup>C NMR (CDCl<sub>3</sub>, 100 MHz): δ 162.0, 149.9, 131.6, 131.2 (d, *J*<sub>c-f</sub> = 94 Hz), 130.8, 129.9, 128.9, 127.1, 126.5, 126.0 (d, *J*<sub>c-f</sub> = 4.0 Hz), 125.2, 124.2; GC-MS: *m/z* = 289.07.

#### 4-(2-phenyloxazol-5-yl)phenol (**3r**)<sup>6</sup>

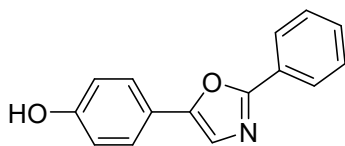

Following the general procedure (EtOAc/Petroleum ether 1:10), **3r** was obtained as a colorless solid, isolated yield: 81%, m.p. > 250 °C. <sup>1</sup>H NMR (DMSO-*d*, 400 MHz): δ 9.89 (s, 1H), 8.06 (t, 2H, *J* = 6.4 Hz), 7.65 (d, 2H, *J* = 8.8 Hz), 7.59 (s, 1H), 7.49-7.57 (m, 3H), 6.87 (d, 2H, *J* = 8.4 Hz); <sup>13</sup>C NMR (DMSO-*d*, 100 MHz): δ 159.7, 158.5, 151.8, 130.8, 129.6, 127.5, 126.3, 126.2, 122.3, 119.0, 116.4; GC-MS: *m/z* = 237.07.

### 5-(4-fluorophenyl)-2-phenyloxazole (3s)<sup>1</sup>

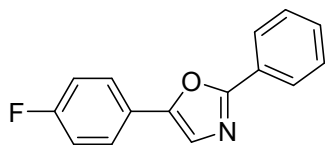

Following the general procedure (EtOAc/Petroleum ether 1:10), **3s** was obtained as a colorless solid, isolated yield: 79%, m.p. 72-74 °C. <sup>1</sup>H NMR (CDCl<sub>3</sub>, 400 MHz): δ 8.09 (q, 2H, *J* = 7.2 Hz), 7.69-7.72 (m, 2H), 7.47-7.49 (m, 3H), 7.38 (s, 1H), 7.15 (d, 2H, *J* = 8.8 Hz); <sup>13</sup>C NMR (CDCl<sub>3</sub>, 100 MHz): δ 161.2 (d, *J*<sub>c-f</sub> = 30 Hz), 150.5, 130.4, 129.1, 128.9, 129.9, 127.2, 126.3, 126.1 (d, *J*<sub>c-f</sub> = 8.0 Hz), 123.1, 116.0 (d, *J*<sub>c-f</sub> = 22 Hz); GC-MS: *m/z* = 239.07.

从

### 5-(4-bromophenyl)-2-phenyloxazole (3t)<sup>6</sup>

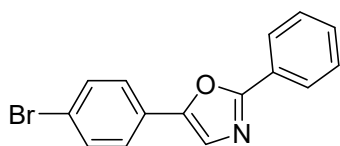

Following the general procedure (EtOAc/Petroleum ether 1:10), **3t** was obtained as a colorless solid, isolated yield: 81%, m.p. 101-103 °C. <sup>1</sup>H NMR (CDCl<sub>3</sub>, 400 MHz): δ 8.09 (q, 2H, *J* = 4.0 Hz), 7.58 (s, 4H), 7.45-7.49 (m, 4H); <sup>13</sup>C NMR (CDCl<sub>3</sub>, 100 MHz): δ 161.5, 150.3, 132.2, 130.5, 128.9, 127.3, 127.0, 126.4, 125.7, 124.0, 123.3; GC-MS: *m/z* = 298.99.

### 5-(4-chlorophenyl)-2-phenyloxazole (3u)<sup>1</sup>

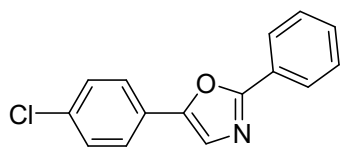

Following the general procedure (EtOAc/Petroleum ether 1:10), **3u** was obtained as a colorless solid, isolated yield: 80%, m.p. 110-112 °C. <sup>1</sup>H NMR (CDCl<sub>3</sub>, 400 MHz): δ 8.09 (q, 2H, *J* = 3.8 Hz), 7.62 (d, 2H, *J* = 8.4 Hz), 7.46-7.50 (m, 3H), 7.41 (d, 2H, *J* = 3.6 Hz), 7.39 (s, 1H); <sup>13</sup>C NMR (CDCl<sub>3</sub>, 100 MHz): δ 161.4, 150.3, 134.2, 130.5, 129.2, 128.9, 127.3, 126.5, 126.4, 125.4, 123.9; GC-MS: *m/z* = 255.04.

### 5-(3-chlorophenyl)-2-phenyloxazole (3v)<sup>4</sup>

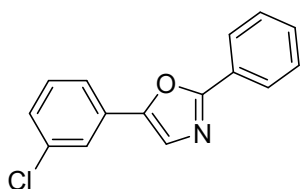

Following the general procedure (EtOAc/Petroleum ether 1:10), **3v** was obtained as a colorless solid, isolated yield: 81%, 102-104 °C. <sup>1</sup>H NMR (CDCl<sub>3</sub>, 400 MHz): δ 8.11 (m, 2H), 7.69 (s, 1H), 7.57 (d, 1H, *J* = 8.0 Hz), 7.46-7.49 (m, 4H), 7.36 (t, 1H, *J* = 8.0 Hz), 7.28 (d, 1H, *J* = 8.4 Hz); <sup>13</sup>C NMR (CDCl<sub>3</sub>, 100 MHz): δ 161.6, 149.9, 135.1, 130.6, 130.2, 129.7, 128.9, 128.4, 127.2, 126.4, 124.4, 124.2, 122.2; GC-MS: *m/z* = 255.04



### 5-(2-chlorophenyl)-2-phenyloxazole (**3w**)<sup>7</sup>

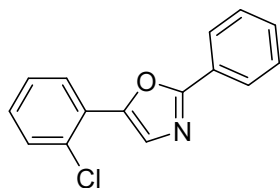

Following the general procedure (EtOAc/Petroleum ether 1:10), **3w** was obtained as a colorless solid, isolated yield: 74%, 101-102 °C. <sup>1</sup>H NMR (CDCl<sub>3</sub>, 400 MHz): δ 8.12 (q, 2H, *J* = 3.8 Hz), 7.72 (s, 1H), 7.59 (d, 1H, *J* = 8.0 Hz), 7.48-7.51 (m, 4H), 7.36 (t, 1H, *J* = 8.0 Hz), 7.31 (d, 1H, *J* = 8.4 Hz); <sup>13</sup>C NMR (CDCl<sub>3</sub>, 100 MHz): δ 161.6, 149.9, 135.1, 130.6, 130.3, 129.7, 128.9, 128.4, 127.3, 126.4, 124.5, 124.2, 122.3; GC-MS: *m/z* = 255.04.

### 5-cyclopropyl-2-phenyloxazole (**3x**)<sup>4</sup>

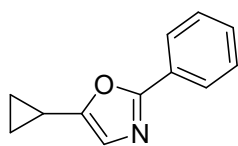

Following the general procedure (EtOAc/Petroleum ether 1:10), **3x** was obtained as a colorless solid, isolated yield: 69%, 70-72 °C. <sup>1</sup>H NMR (CDCl<sub>3</sub>, 400 MHz): δ 7.99 (q, 2H, *J* = 3.8 Hz), 7.40-7.45 (m, 3H), 6.81 (s, 1H), 1.92-1.99 (m, 1H), 0.97-1.00 (m, 2H), 0.85-0.88 (m, 2H); <sup>13</sup>C NMR (CDCl<sub>3</sub>, 100 MHz): δ 161.1, 154.6, 129.9, 128.7, 127.8, 126.0, 122.6, 6.7, 6.5; GC-MS: *m/z* = 185.08.

## 4. References

- (1) Chatterjee, T.; Cho, J. Y.; Cho, E. J. Synthesis of Substituted Oxazoles by Visible-Light Photocatalysis. *J. Org. Chem.* **2016**, *81* (16), 6995–7000. <https://doi.org/10.1021/acs.joc.6b00989>.
- (2) Xu, Z.; Zhang, C.; Jiao, N. Synthesis of Oxazoles through Copper-Mediated Aerobic Oxidative Dehydrogenative Annulation and Oxygenation of Aldehydes and Amines. *Angew. Chem. Int. Ed.* **2012**, *51* (45), 11367–11370. <https://doi.org/10.1002/anie.201206382>.
- (3) Yuan, S.; Li, Z.; Xu, L. Convenient One-Pot Synthesis of 2,5-Disubstituted Oxazoles via a Catalytic Oxidative Dehydrogenation of F<sub>3</sub>CSO<sub>3</sub>H·SiO<sub>2</sub>-DDQ/CuCl<sub>2</sub>/LiCl: Oxazole, Aldoximes, Cyclization, DDQ, Catalytic Oxidation. *J. Heterocycl. Chem.* **2013**, *50* (6), 1405–1409. <https://doi.org/10.1002/jhet.1637>.
- (4) Yu, X.; Chen, K.; Wang, Q.; Zhang, W.; Zhu, J. Synthesis of 2,5-Disubstituted Oxazoles via Cobalt(III)-Catalyzed Cross-Coupling of *N*-Pivaloyloxyamides and Alkynes. *Chem. Commun.* **2018**, *54* (10), 1197–1200. <https://doi.org/10.1039/C7CC08611C>.
- (5) Zhang, X.; He, Y.; Li, J.; Wang, R.; Gu, L.; Li, G. CO<sub>2</sub>/Photoredox-Cocatalyzed Tandem Oxidative Cyclization of  $\alpha$ -Bromo Ketones and Amines To Construct Substituted Oxazoles. *J. Org. Chem.* **2019**, *84* (12), 8225–8231. <https://doi.org/10.1021/acs.joc.9b00283>.

- (6) Jiang, H.; Huang, H.; Cao, H.; Qi, C. TBHP/I<sub>2</sub>-Mediated Domino Oxidative Cyclization for One-Pot Synthesis of Polysubstituted Oxazoles. *Org. Lett.* **2010**, *12* (23), 5561–5563.  
<https://doi.org/10.1021/ol1023085>.
- (7) Hu, T.; Yan, H.; Liu, X.; Wu, C.; Fan, Y.; Huang, J.; Huang, G. Metal-Free Sp<sup>3</sup> C–H Functionalization: PABS/I<sub>2</sub>-Promoted Synthesis of Polysubstituted Oxazole Derivatives from Arylethanones and 2-Amino-2-Alkyl/Arylacetic Acid. *Synlett* **2015**, *26* (20), 2866–2869.  
<https://doi.org/10.1055/s-0035-1560660>.

# Copies of <sup>1</sup>H NMR and <sup>13</sup>C NMR spectra

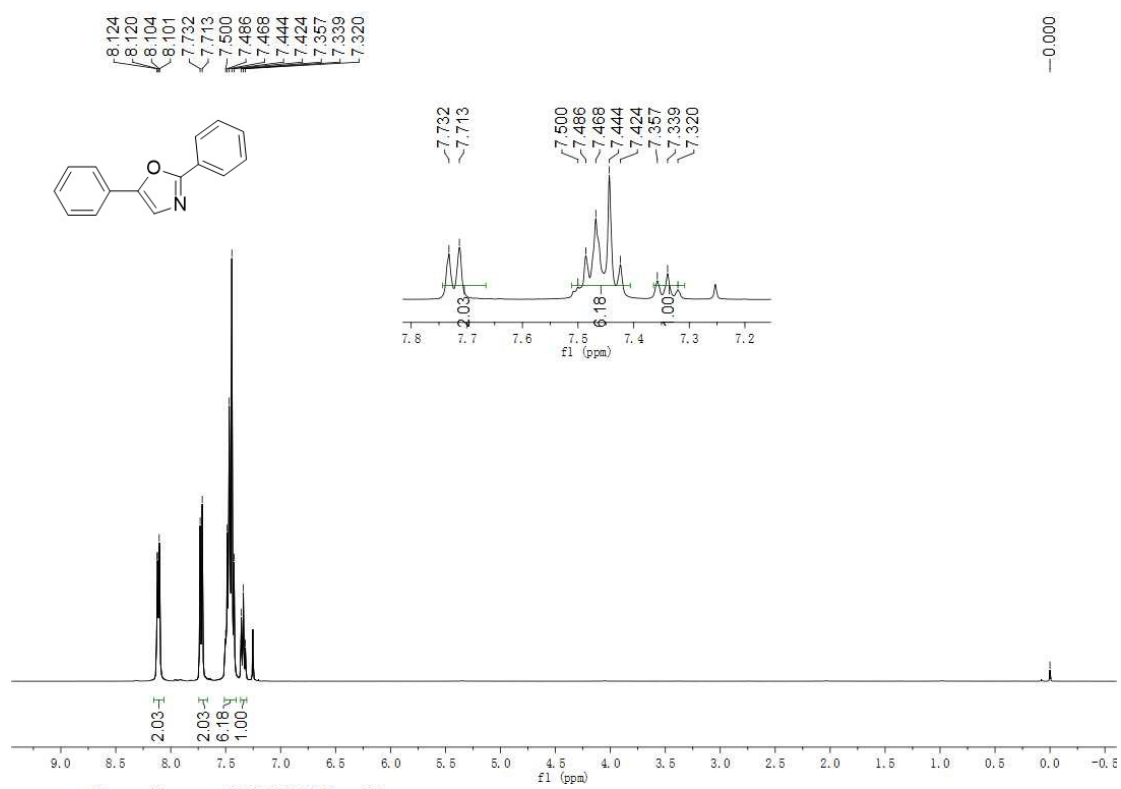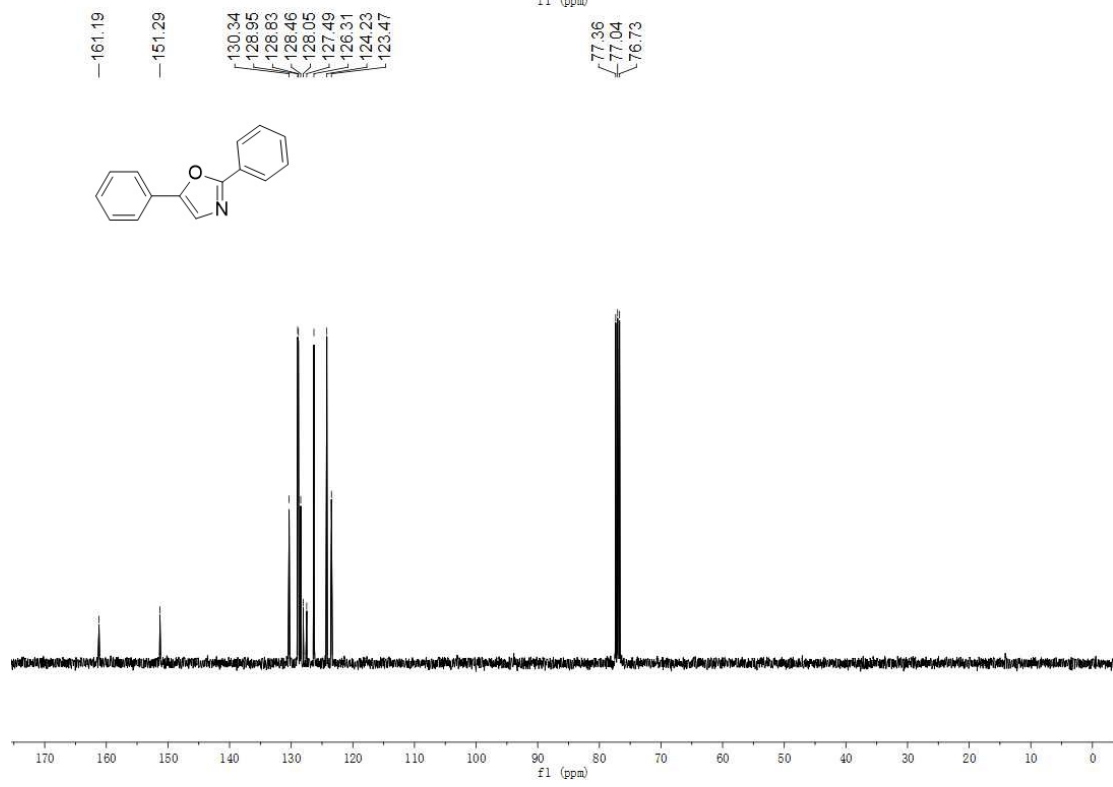

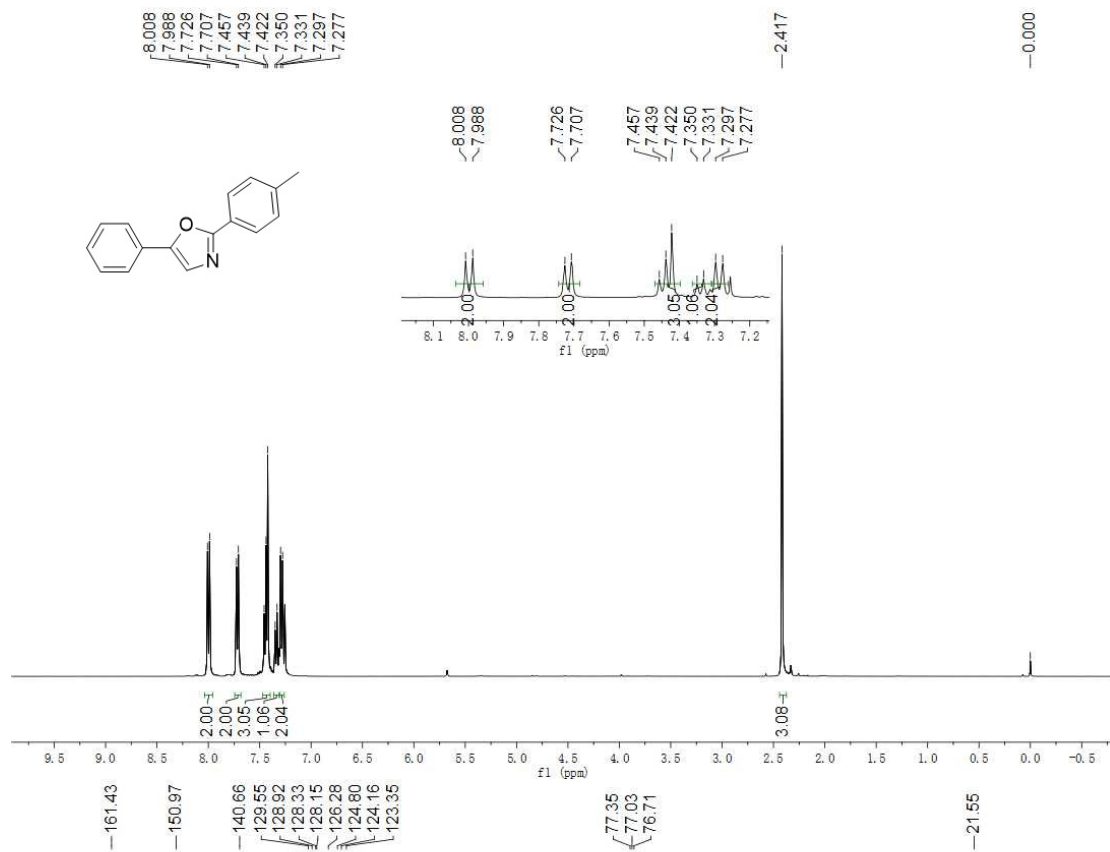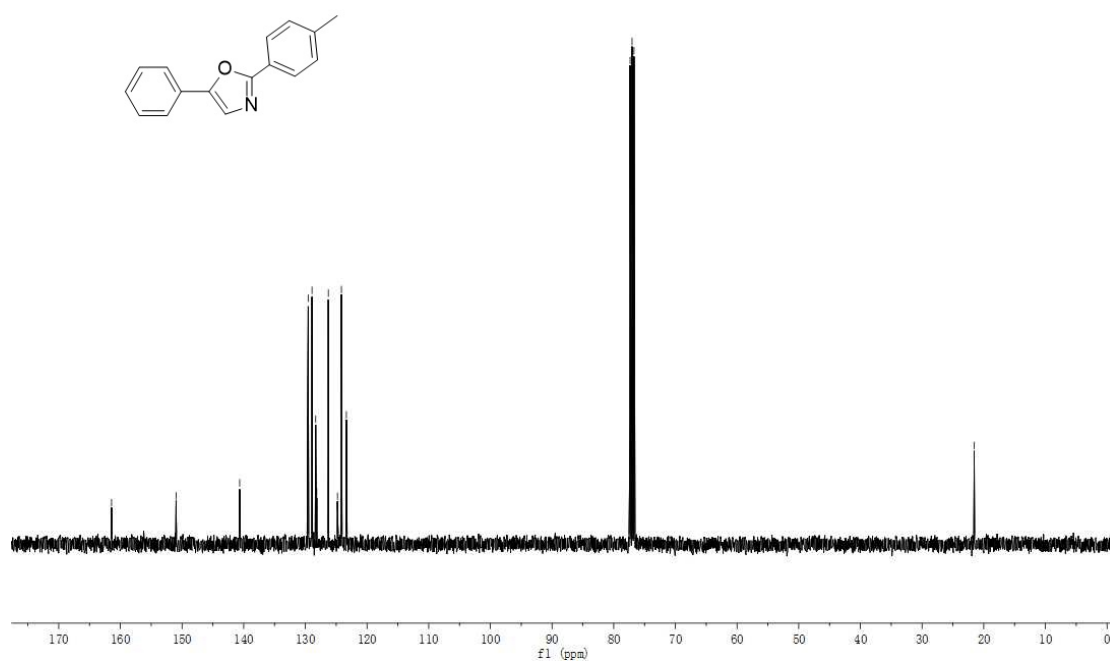

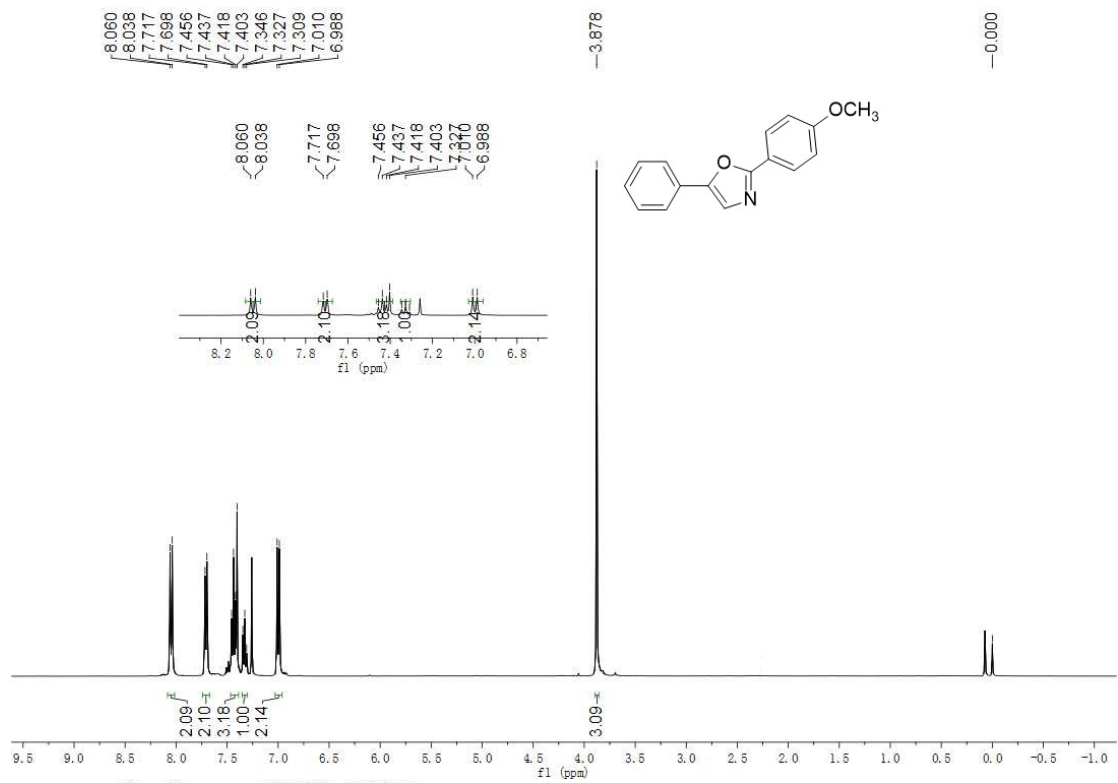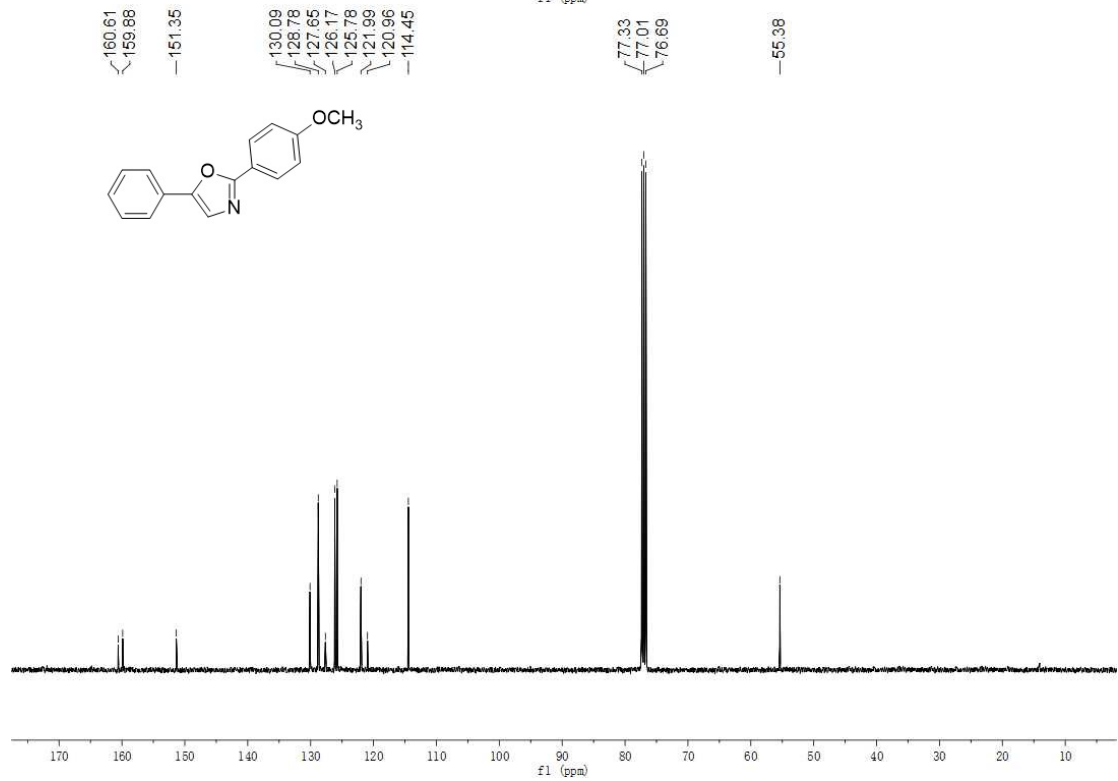

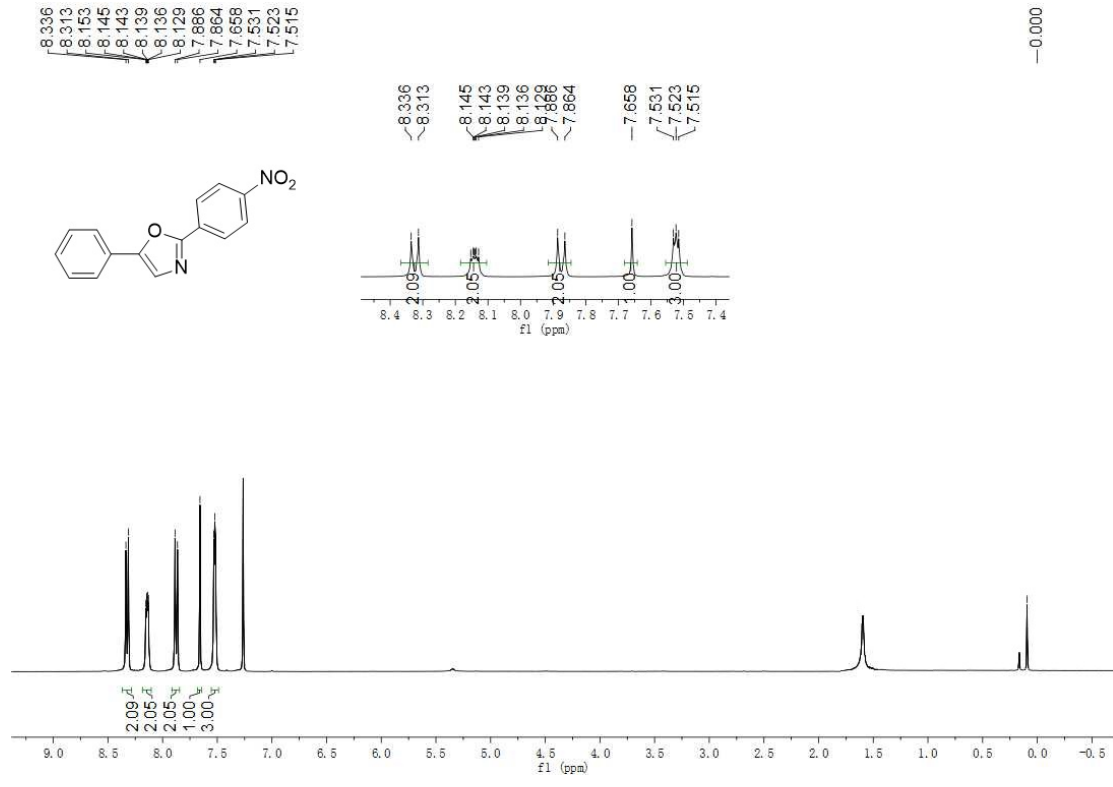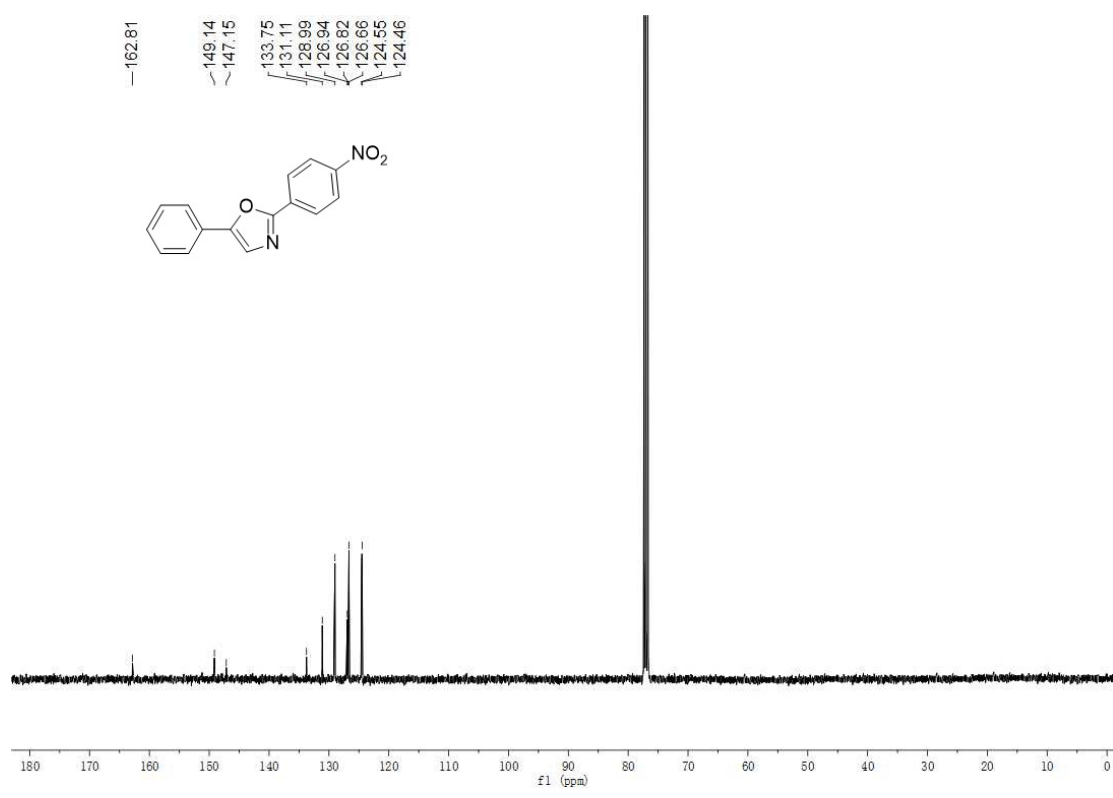

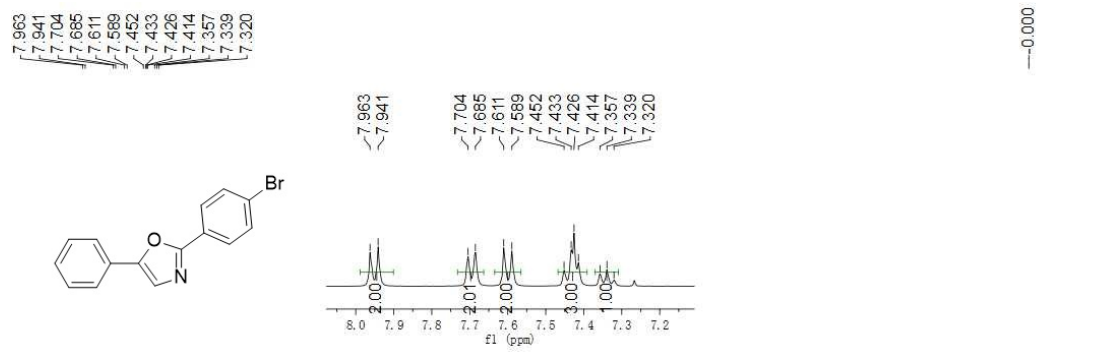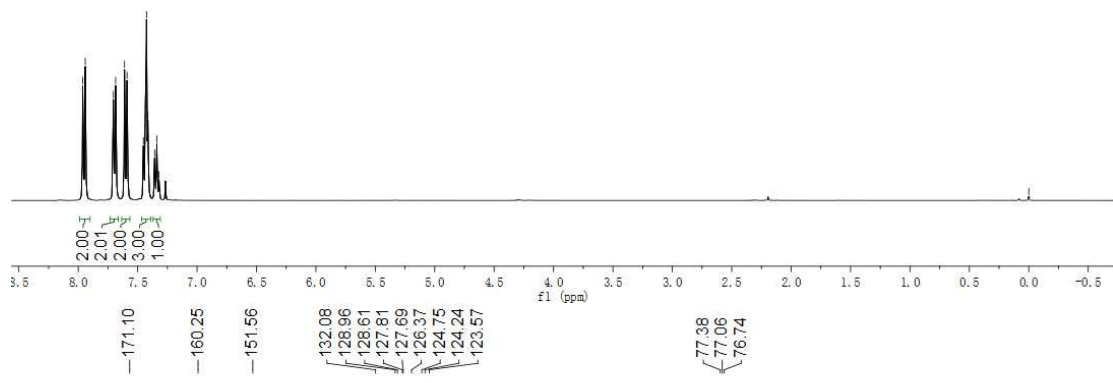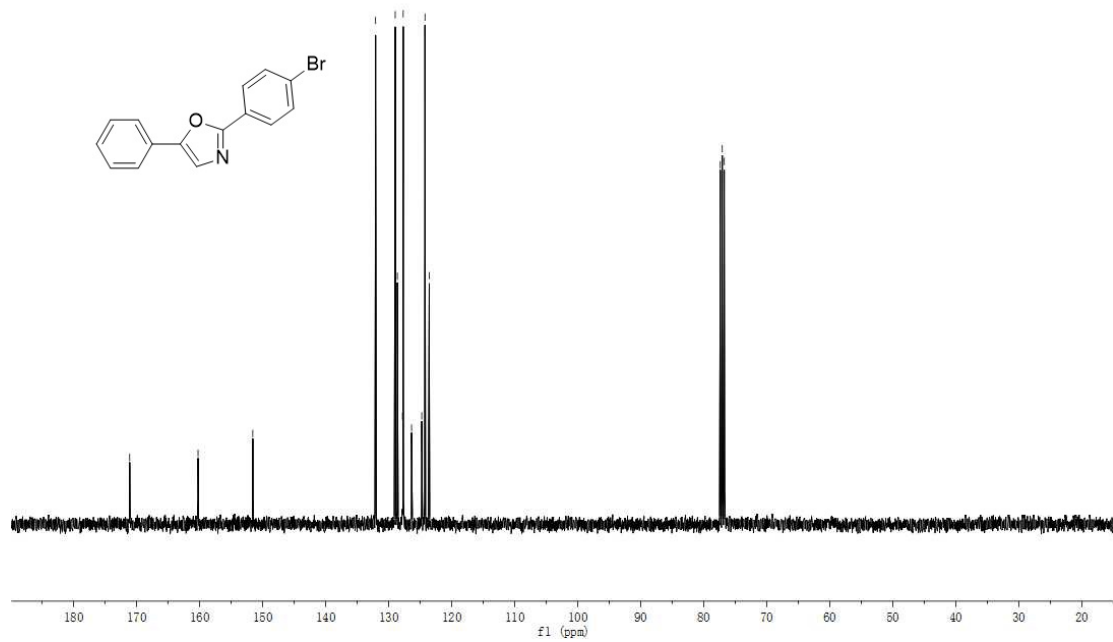

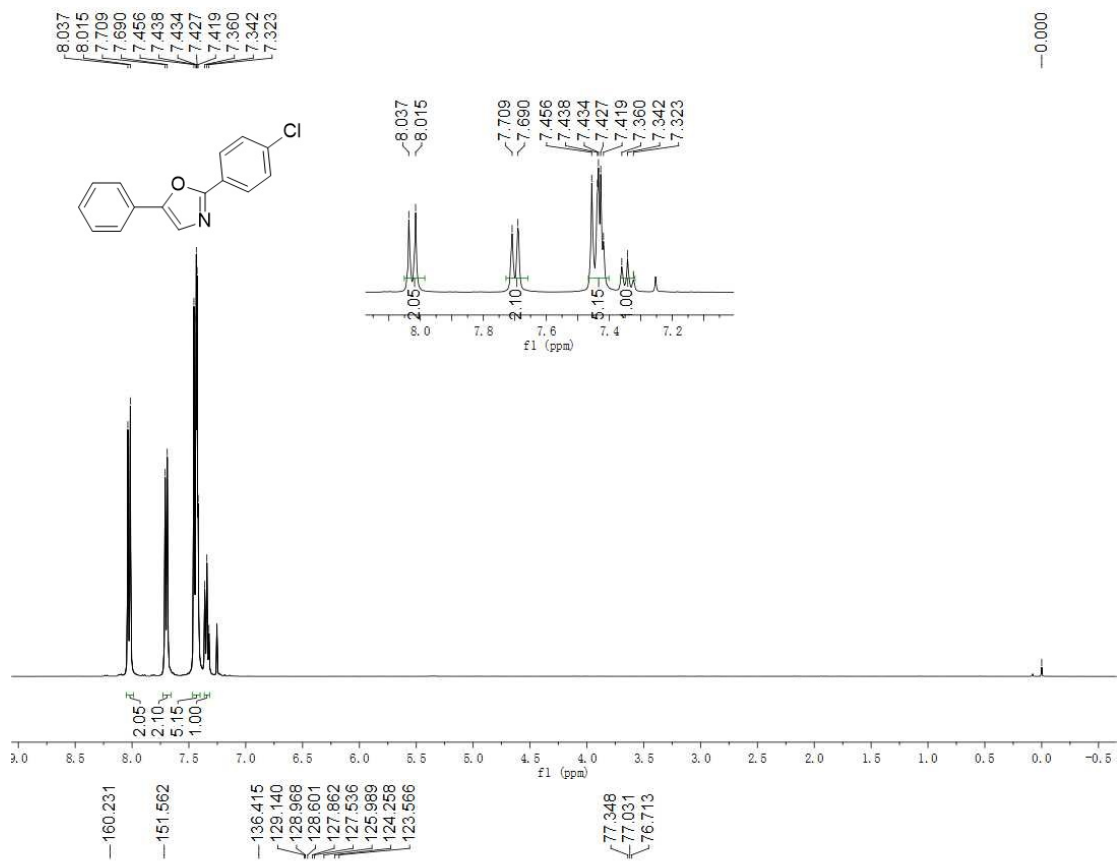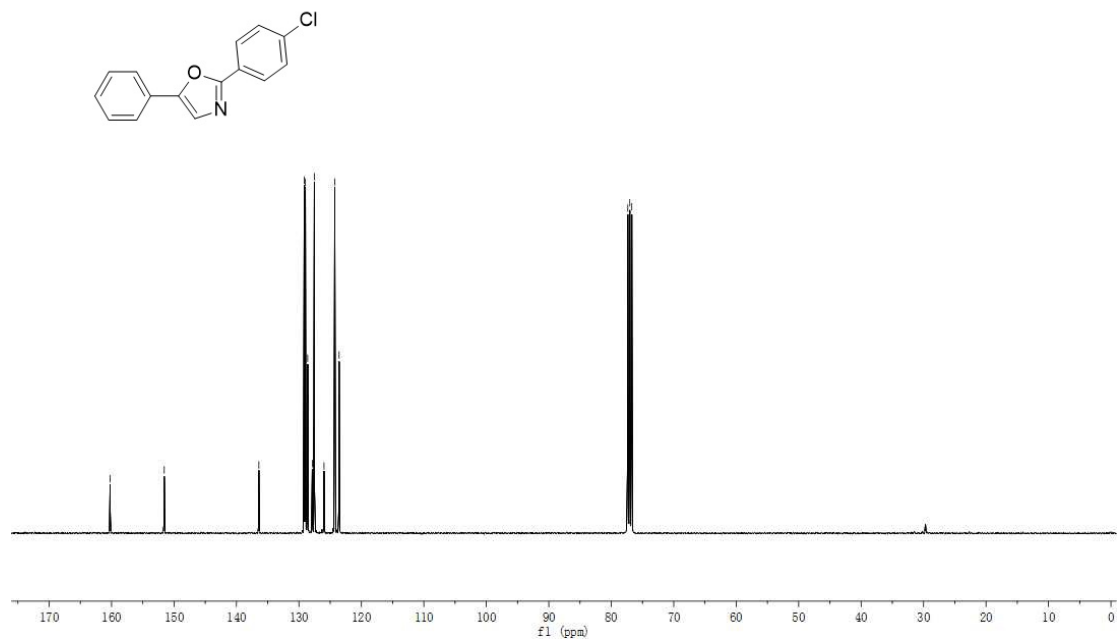



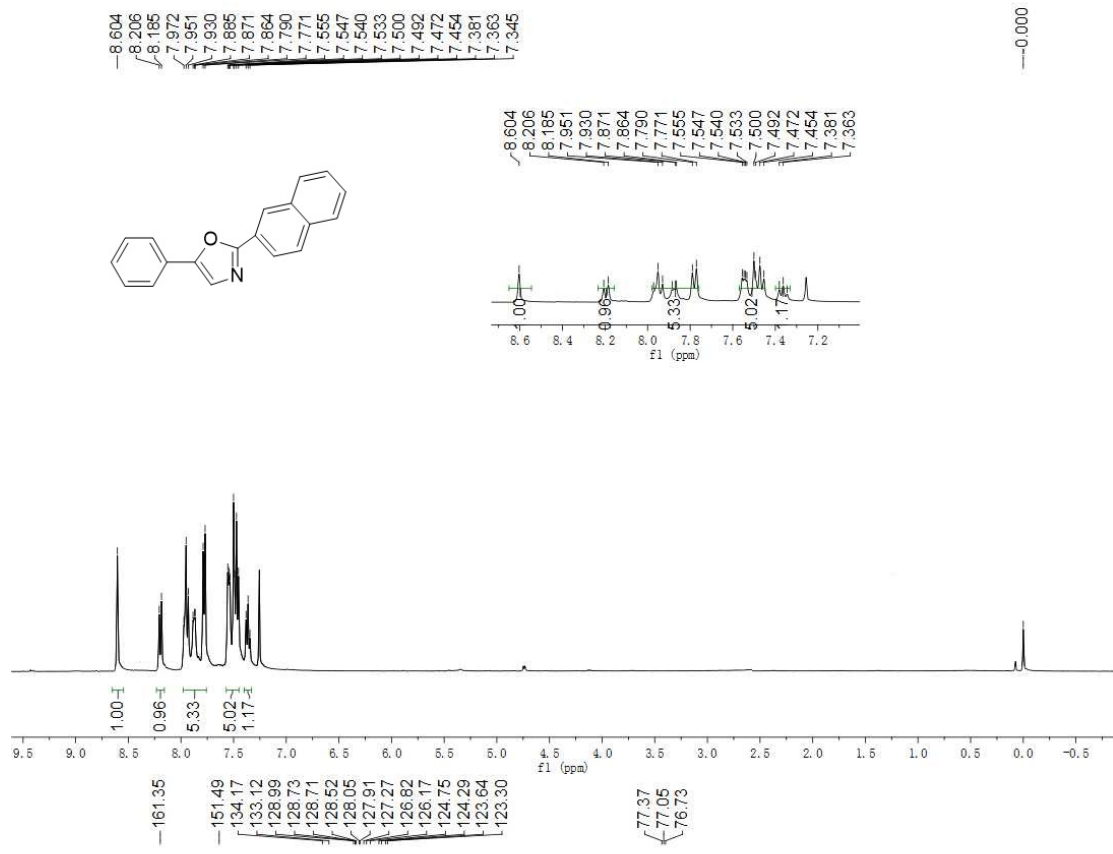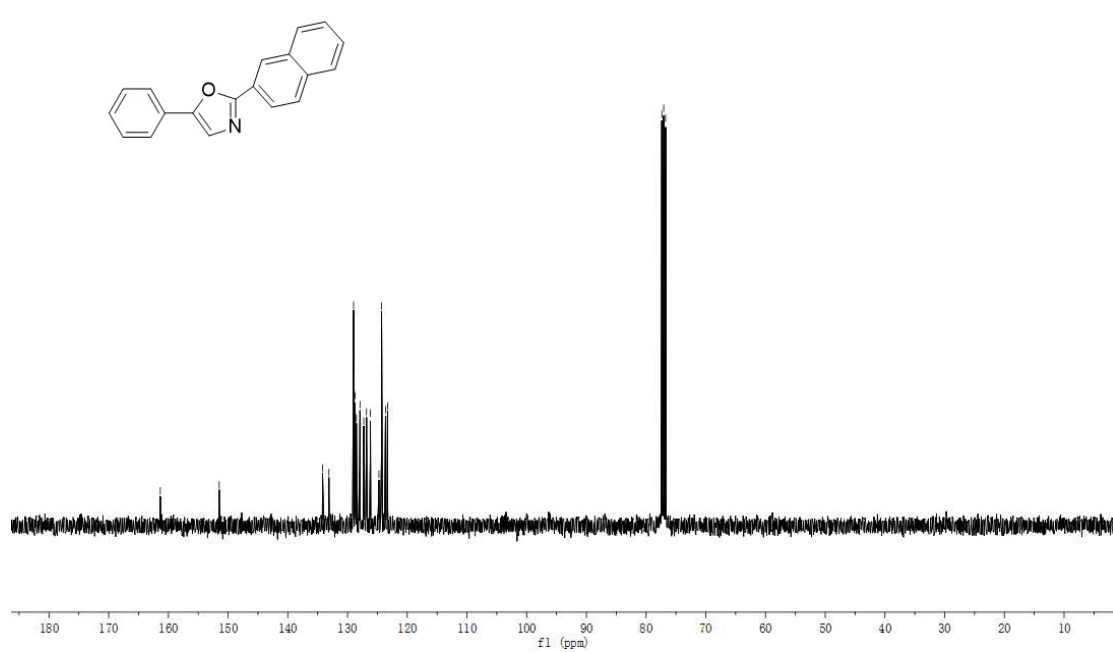

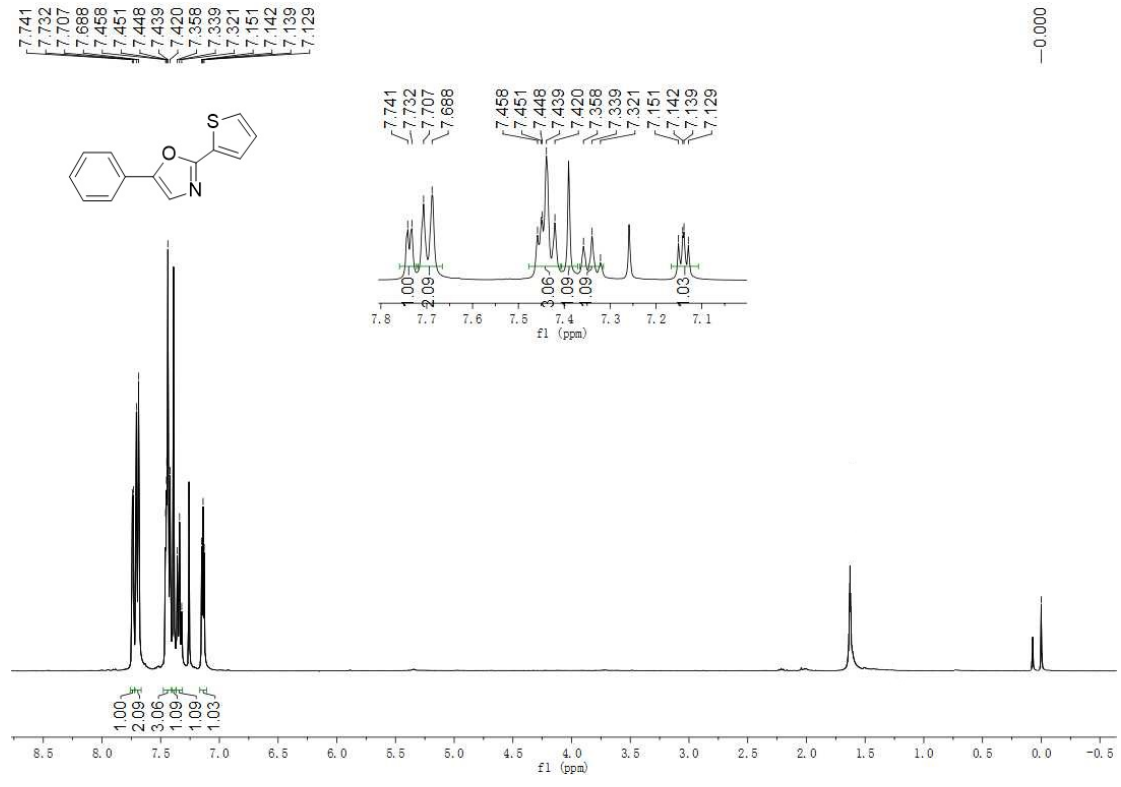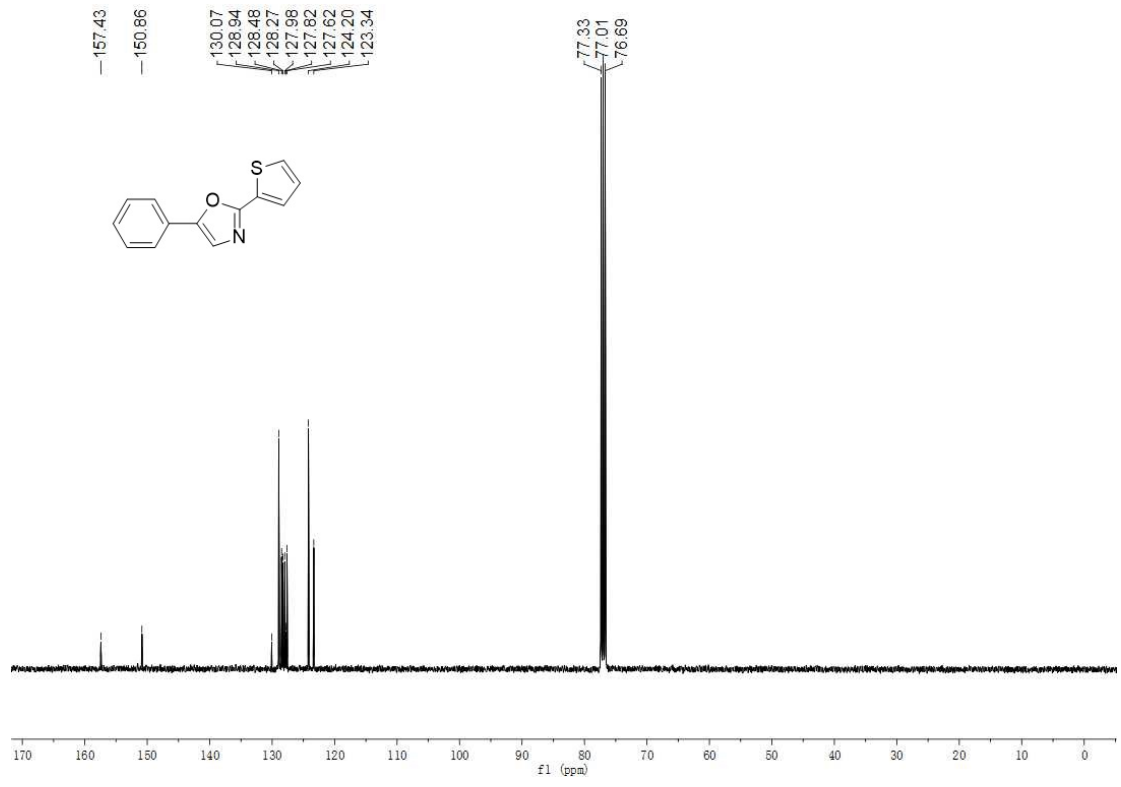

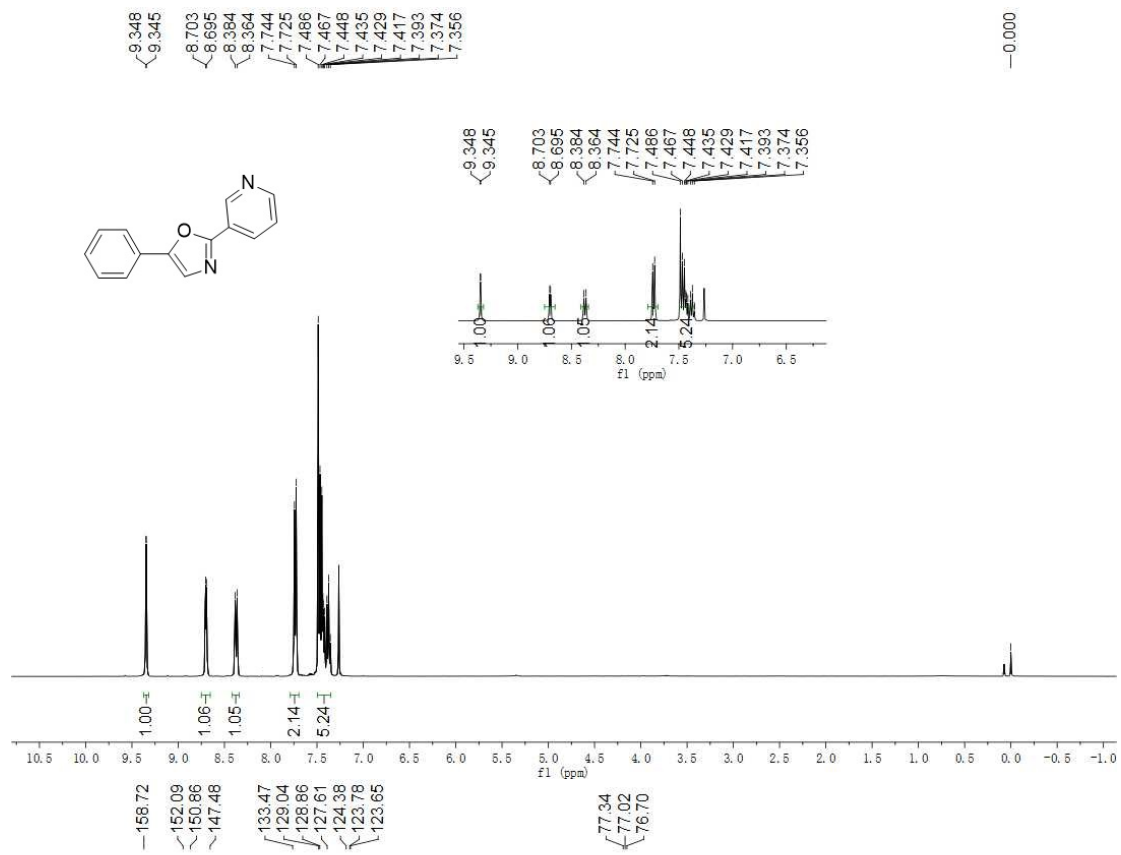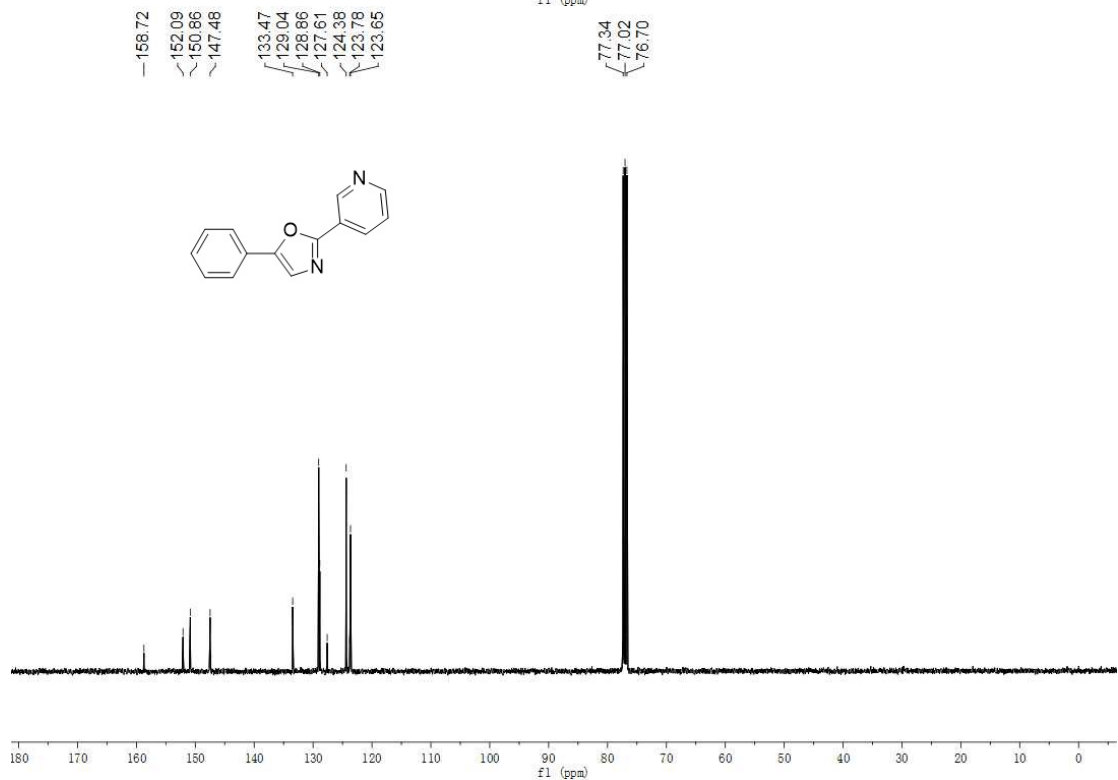

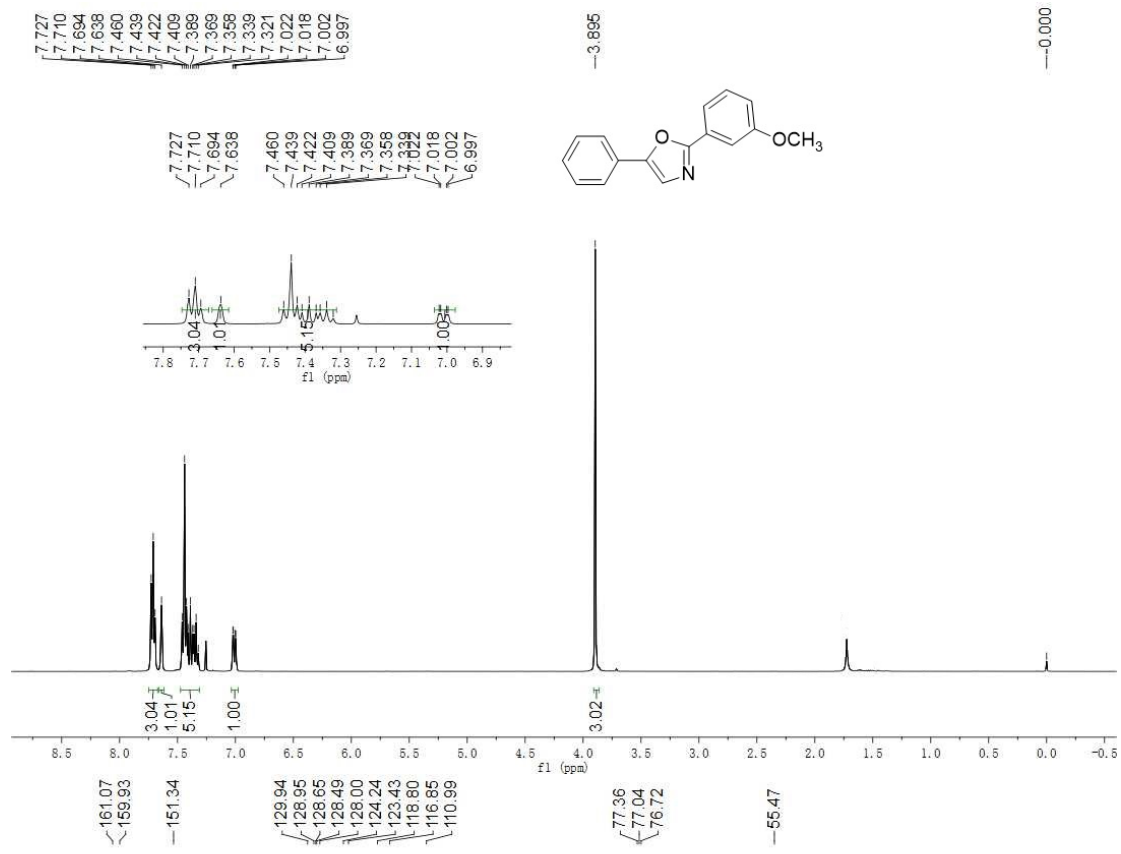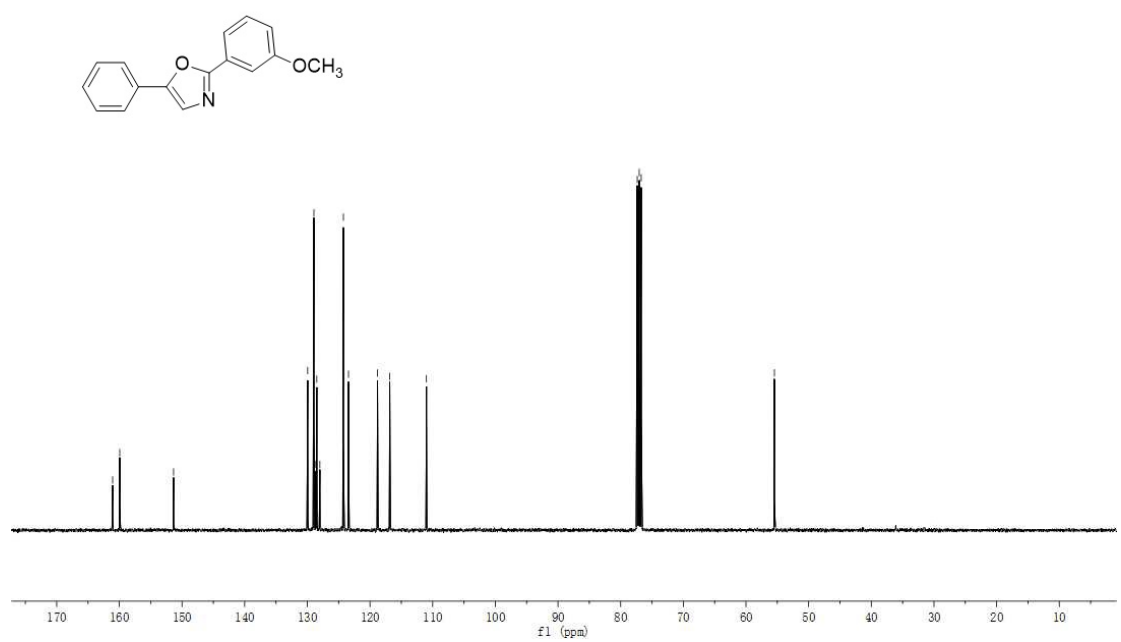

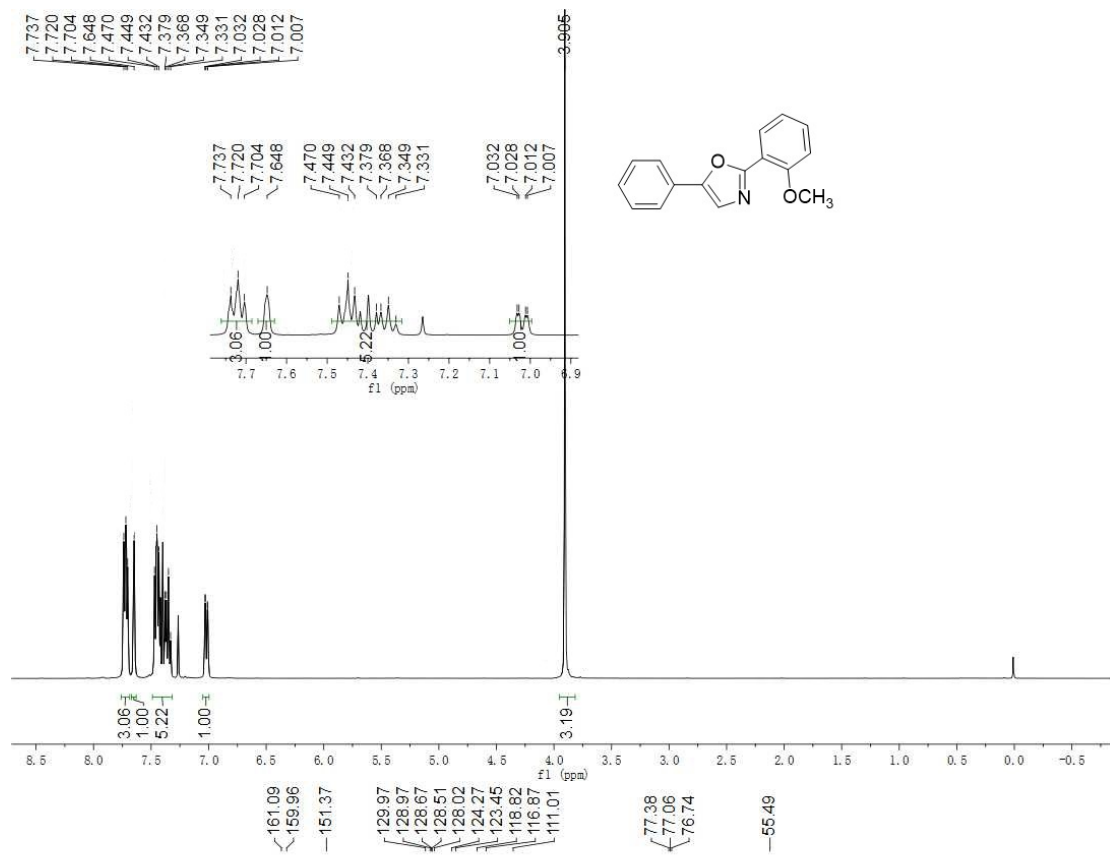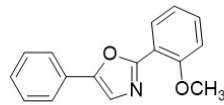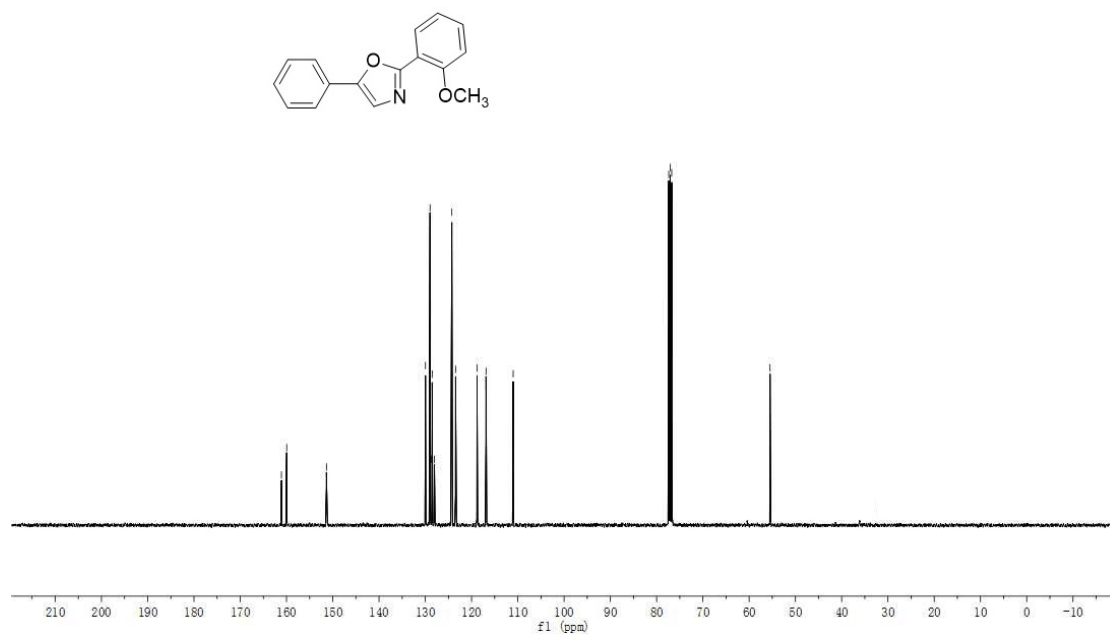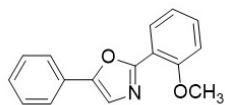

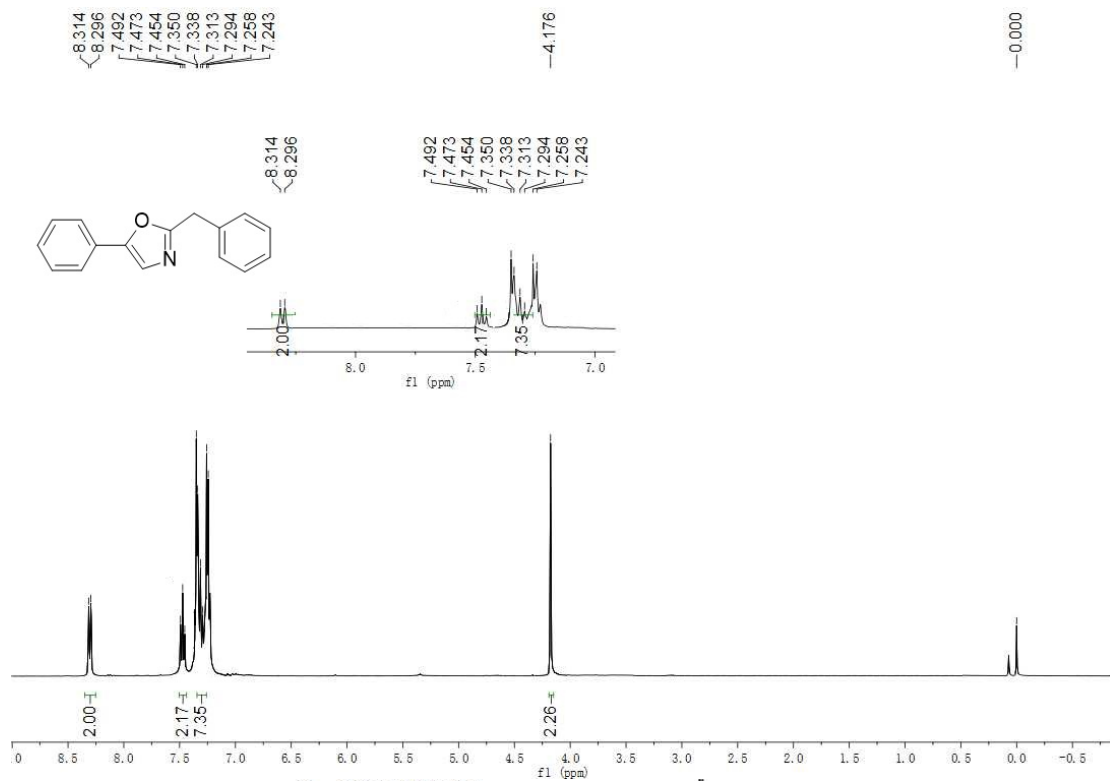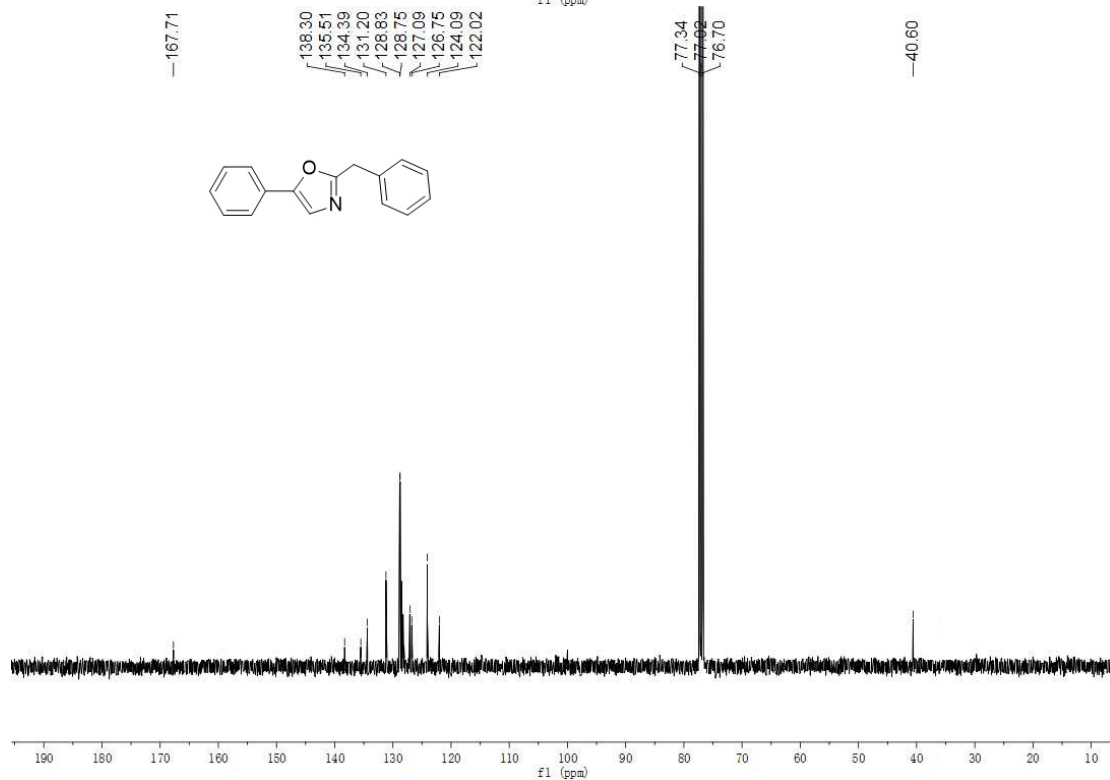

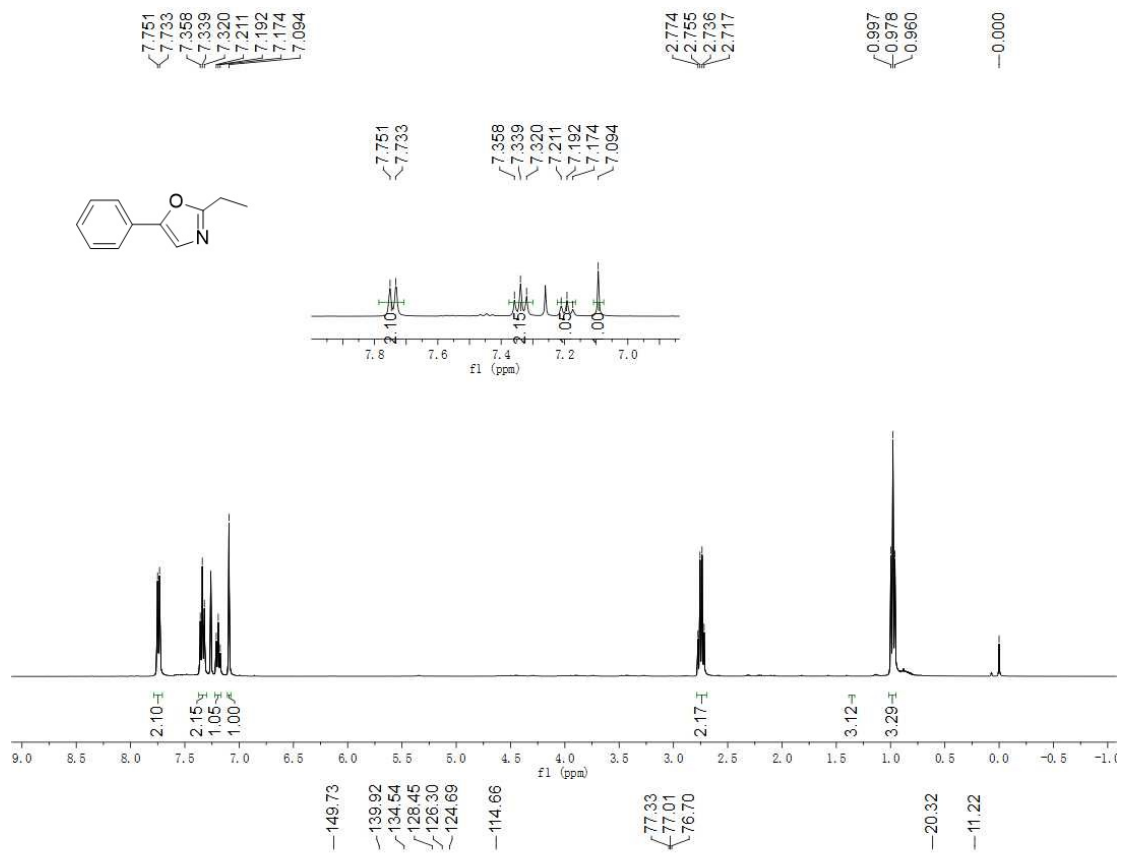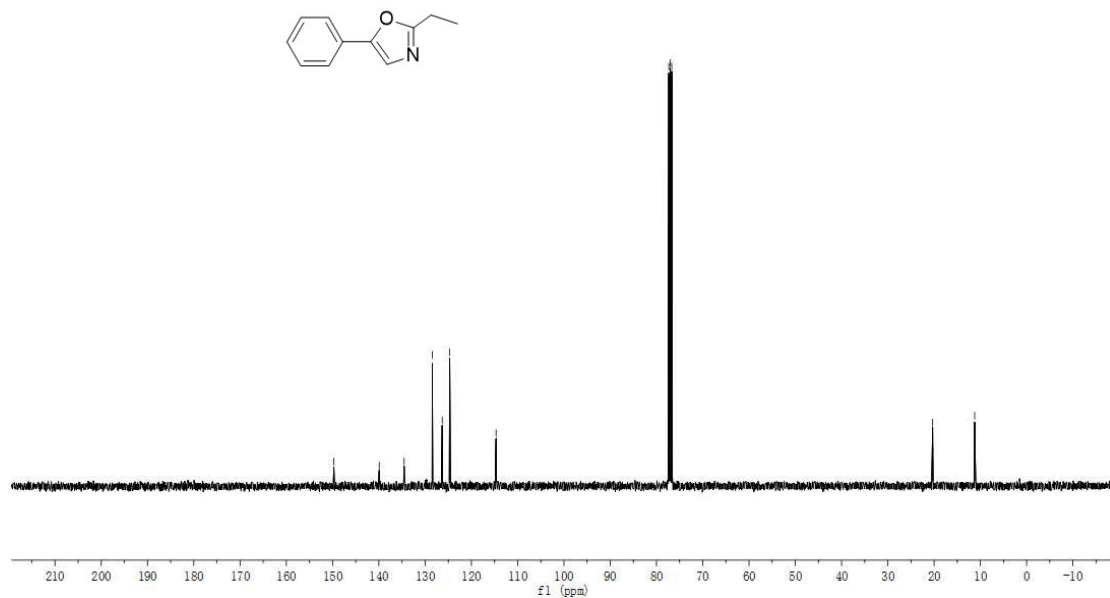

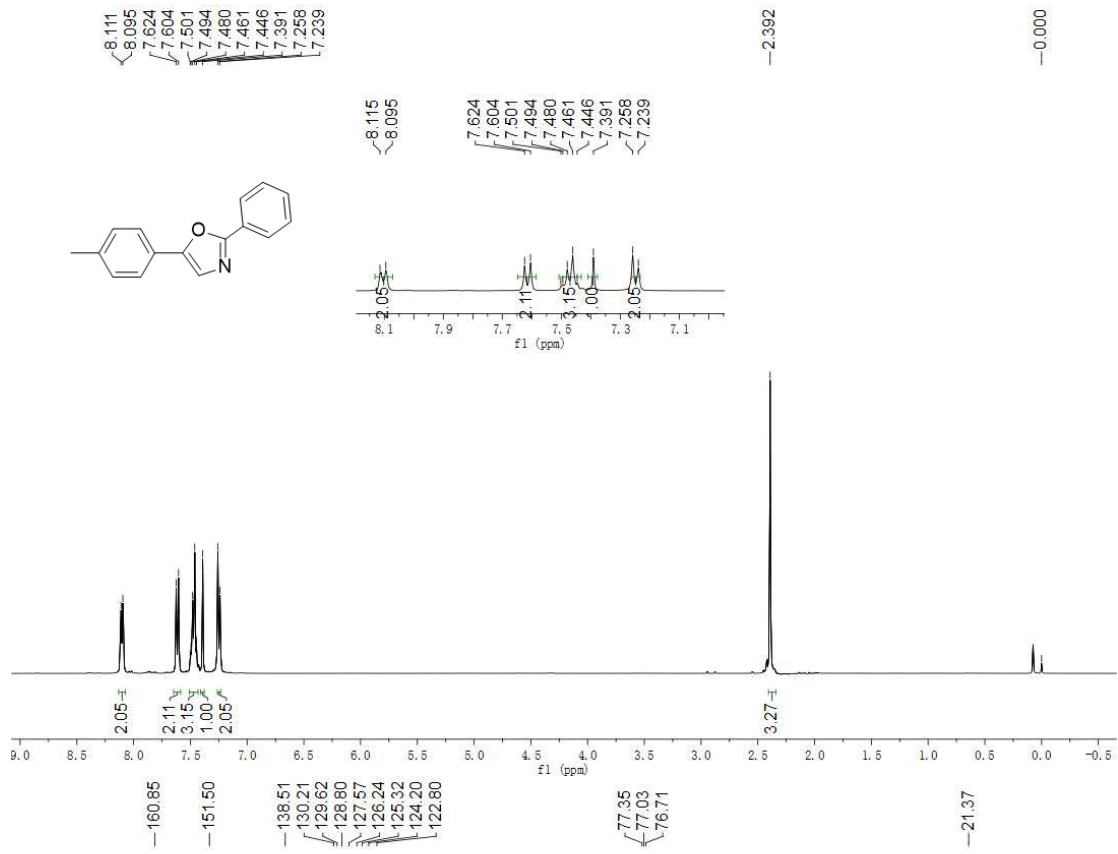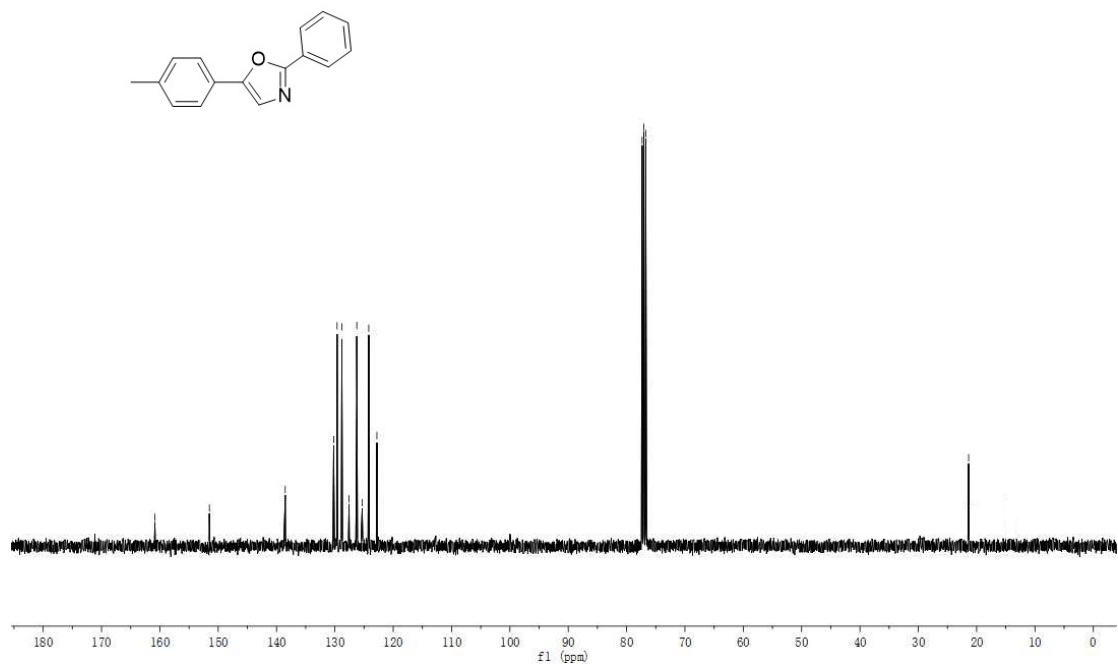



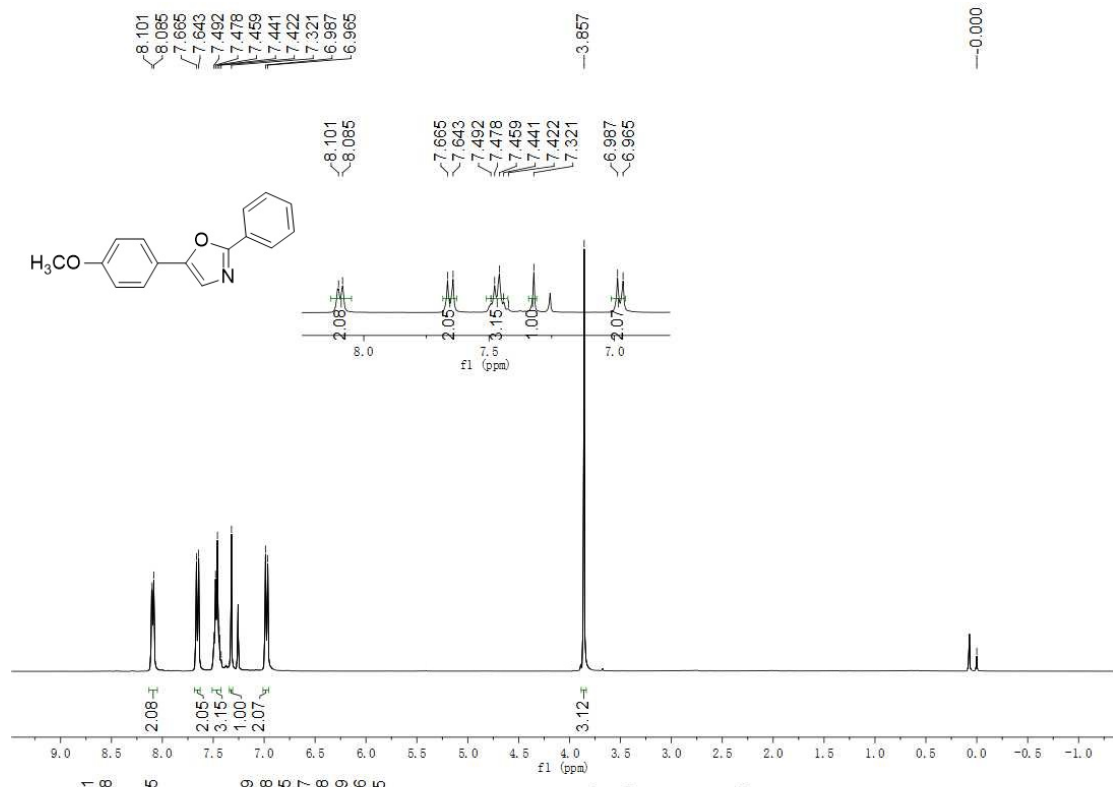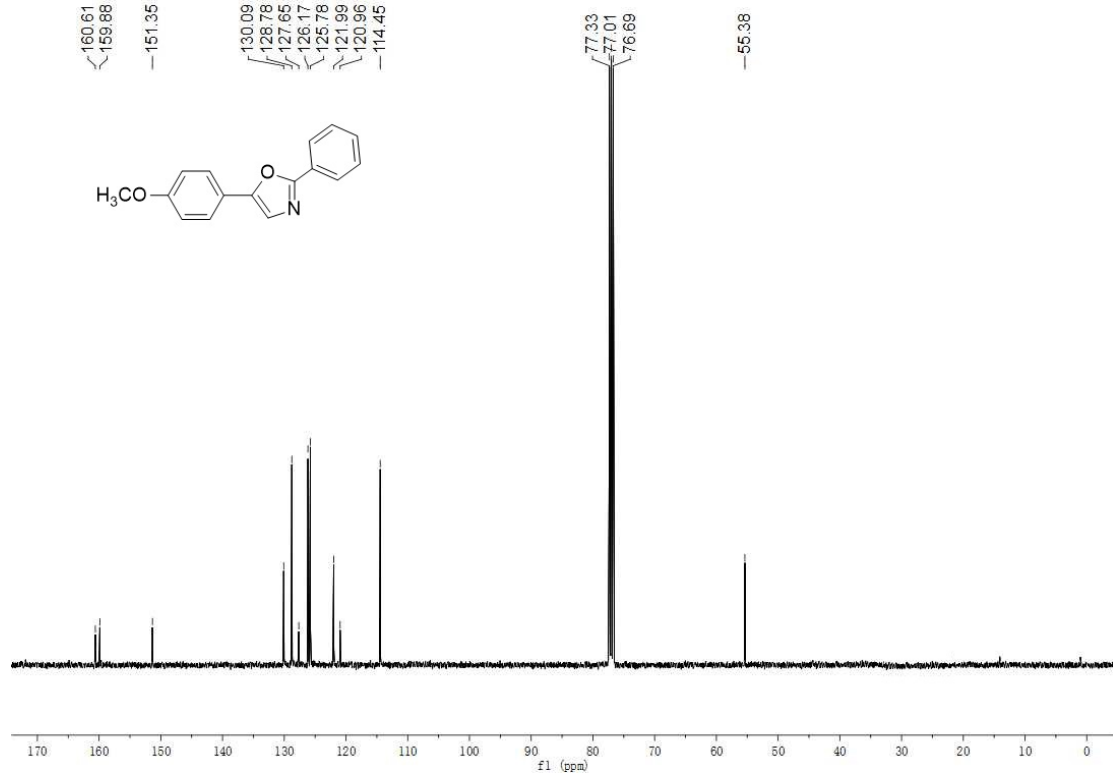

8.336  
8.313  
8.153  
8.145  
8.143  
8.139  
8.136  
8.129  
7.886  
7.864  
7.658  
7.531  
7.523  
7.515

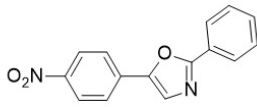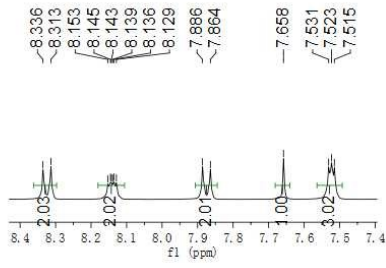

-0.000

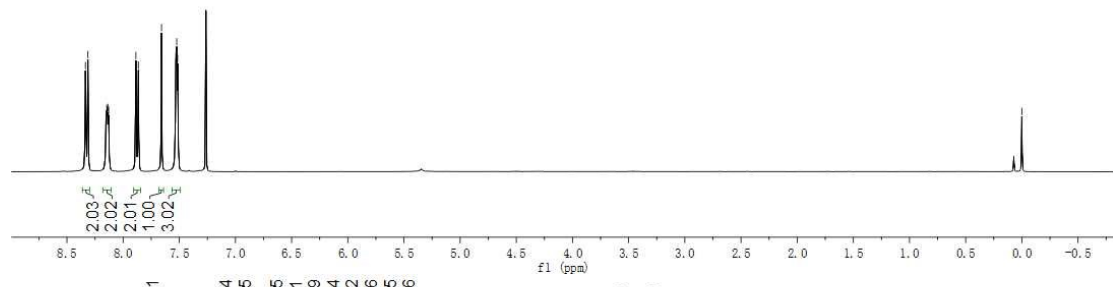

162.81  
149.14  
147.15  
133.75  
131.11  
128.99  
126.94  
126.82  
126.66  
124.55  
124.46  
77.33  
77.01  
76.69

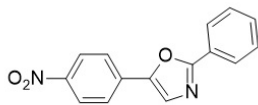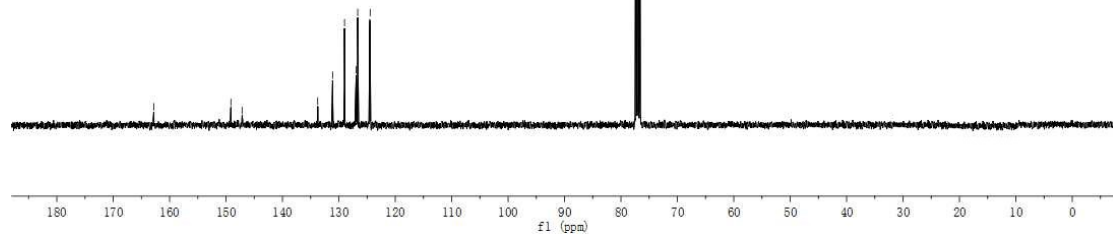

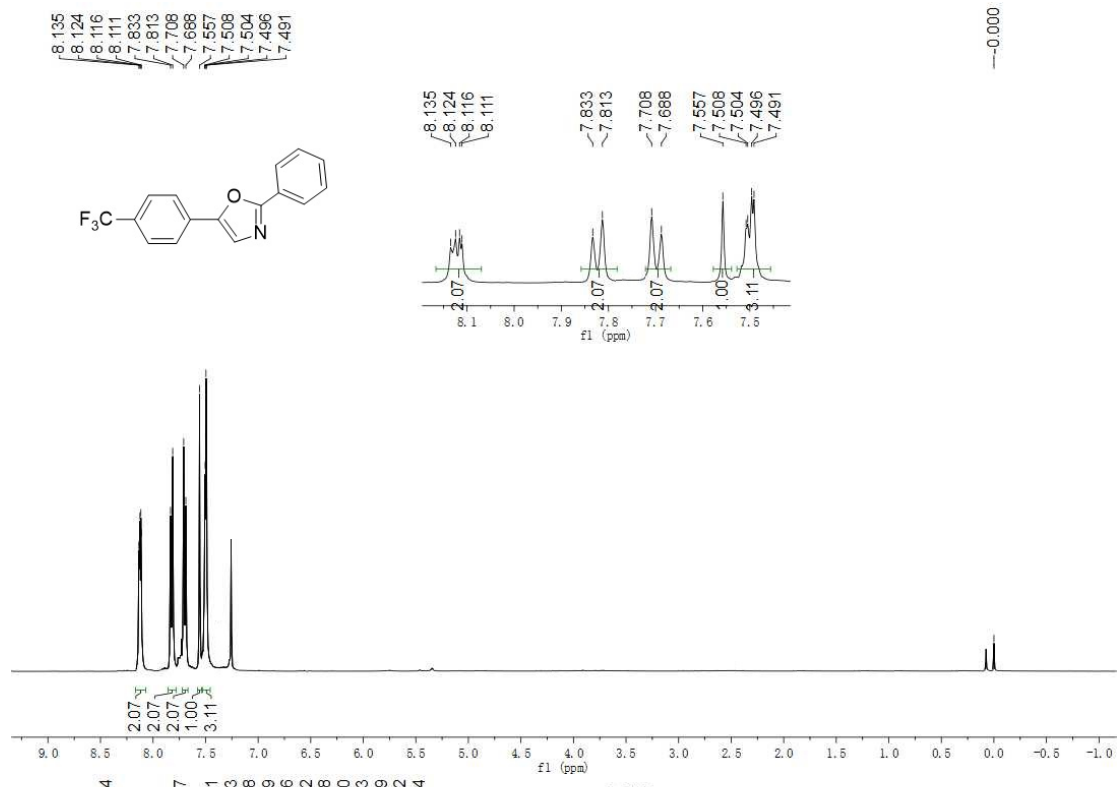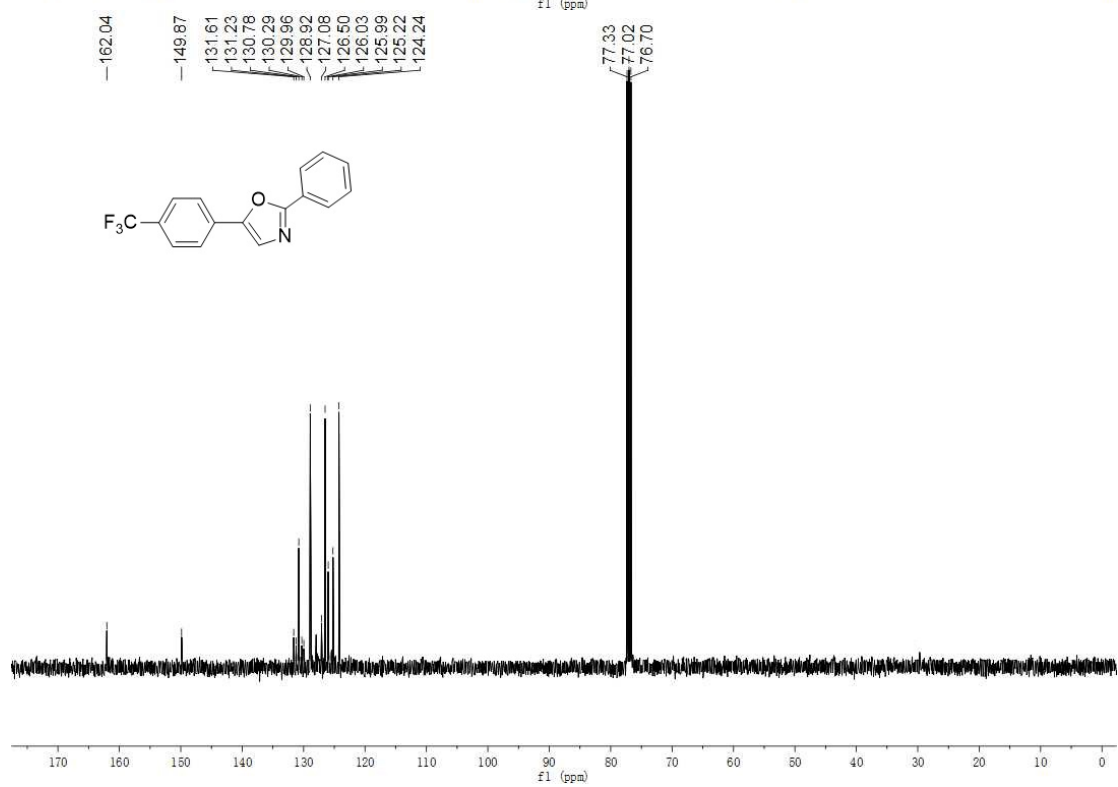

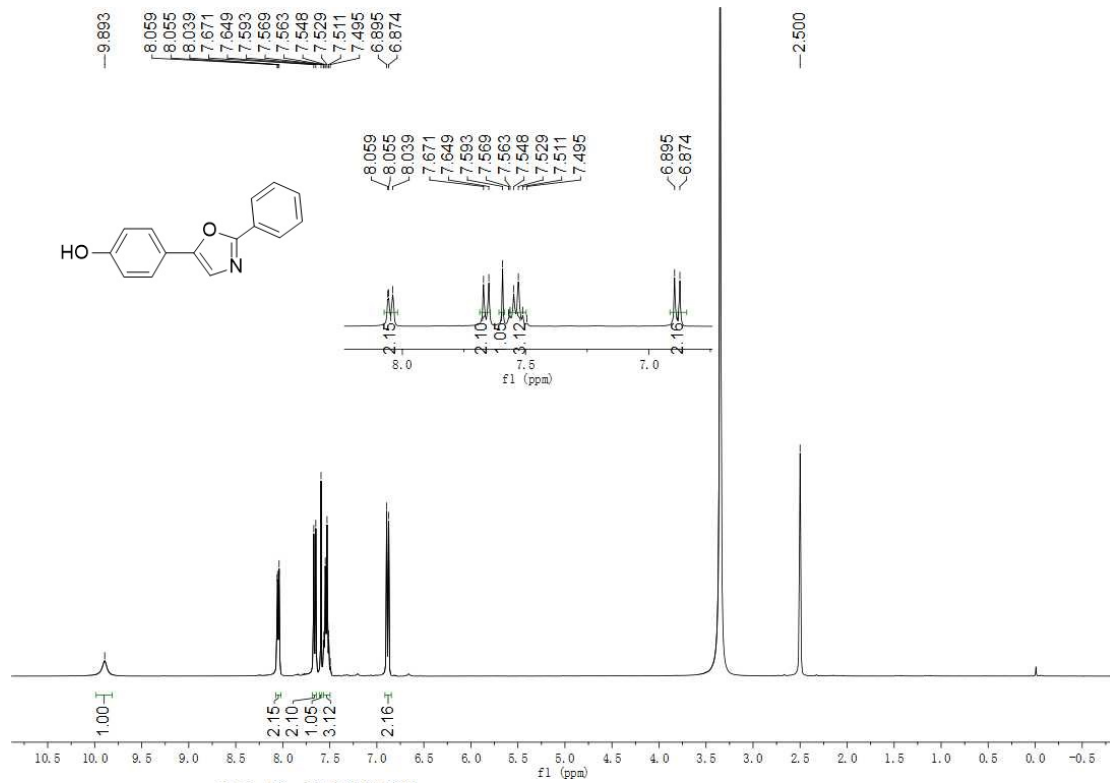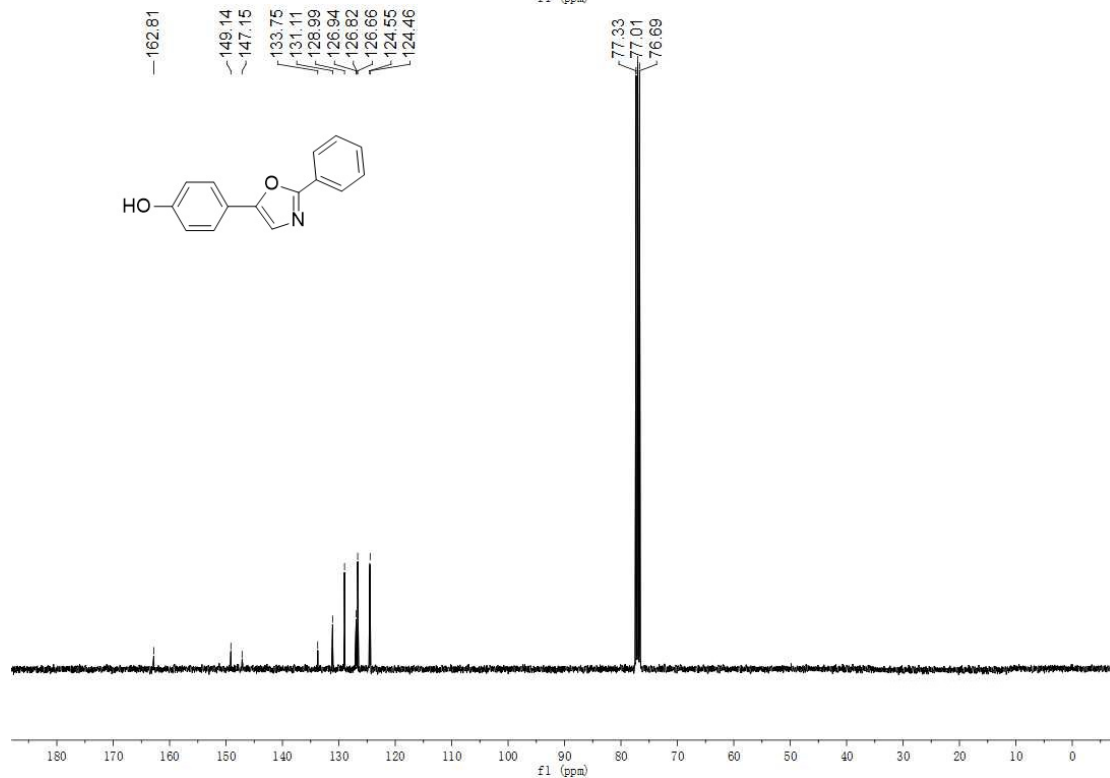

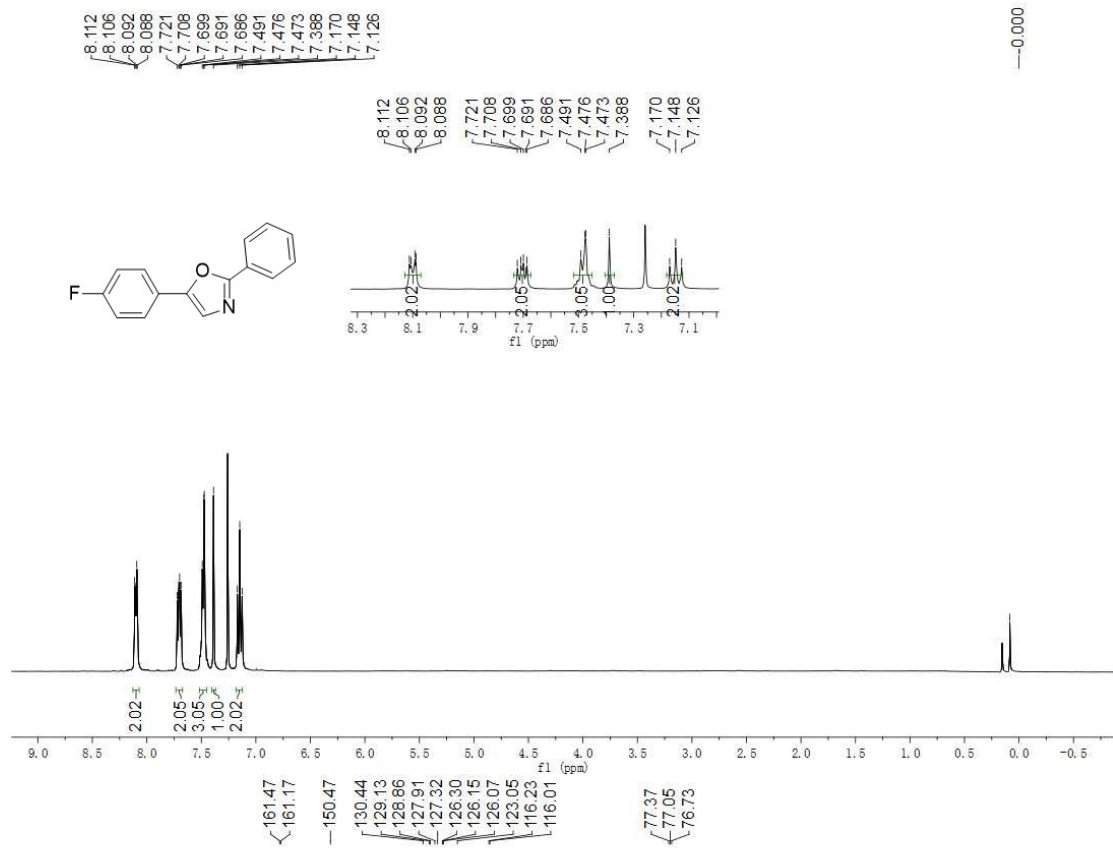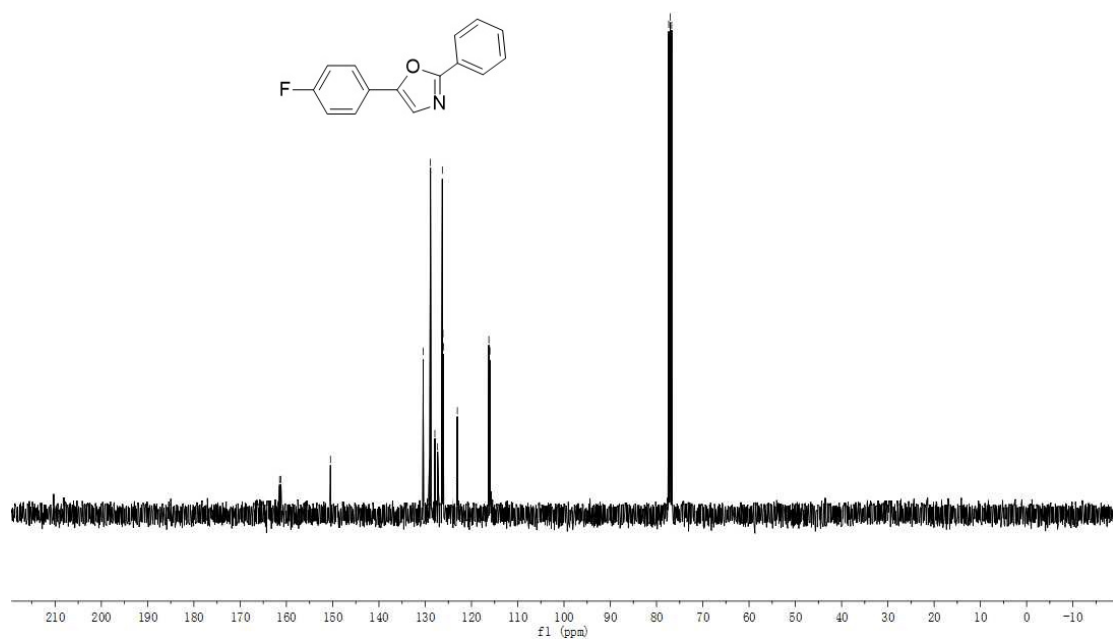

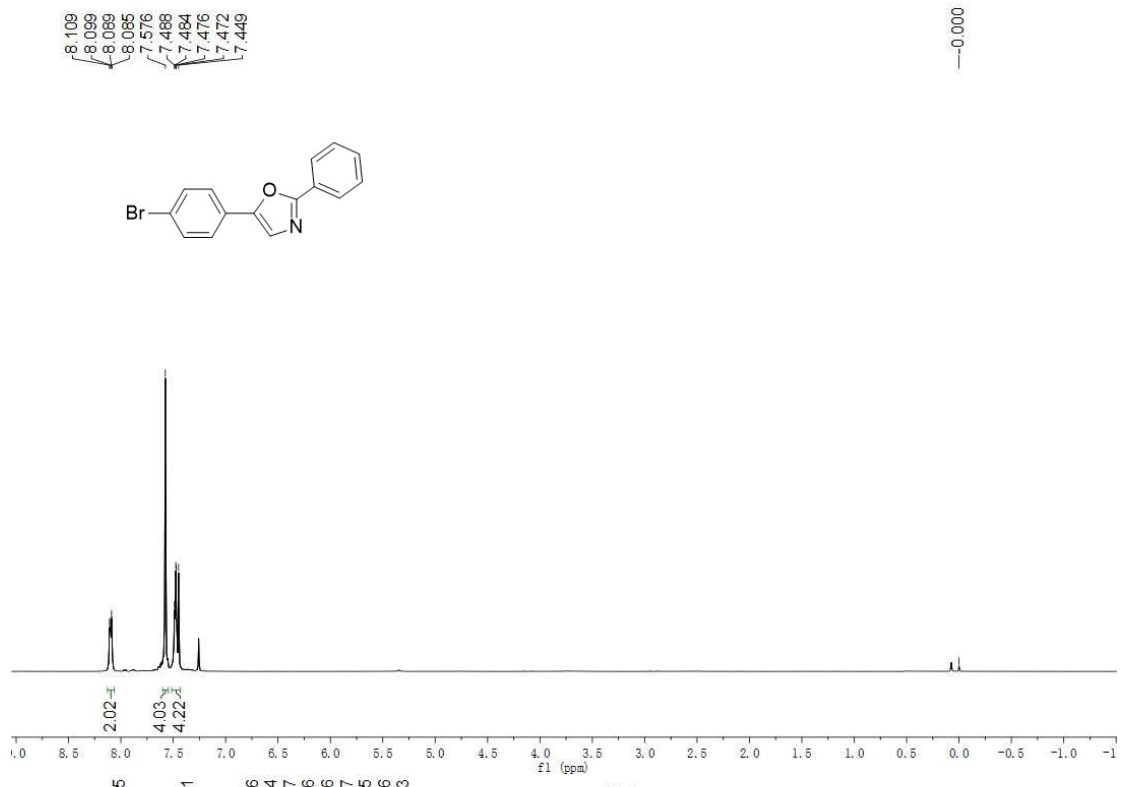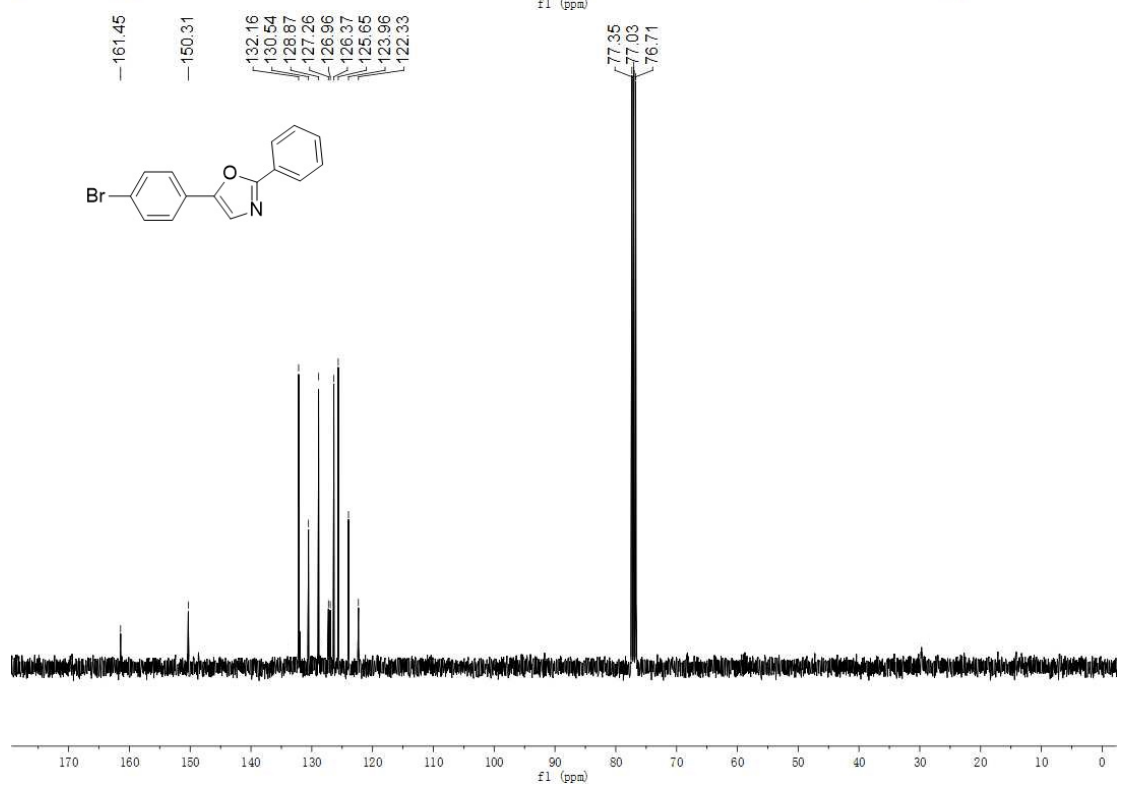

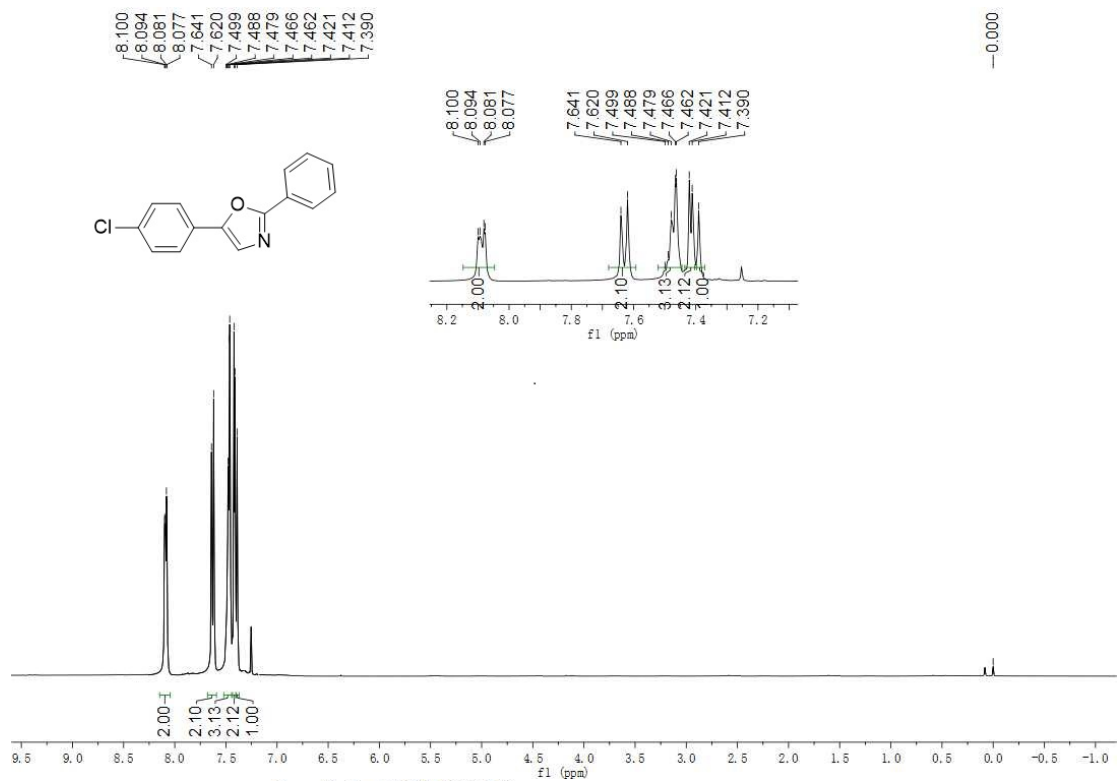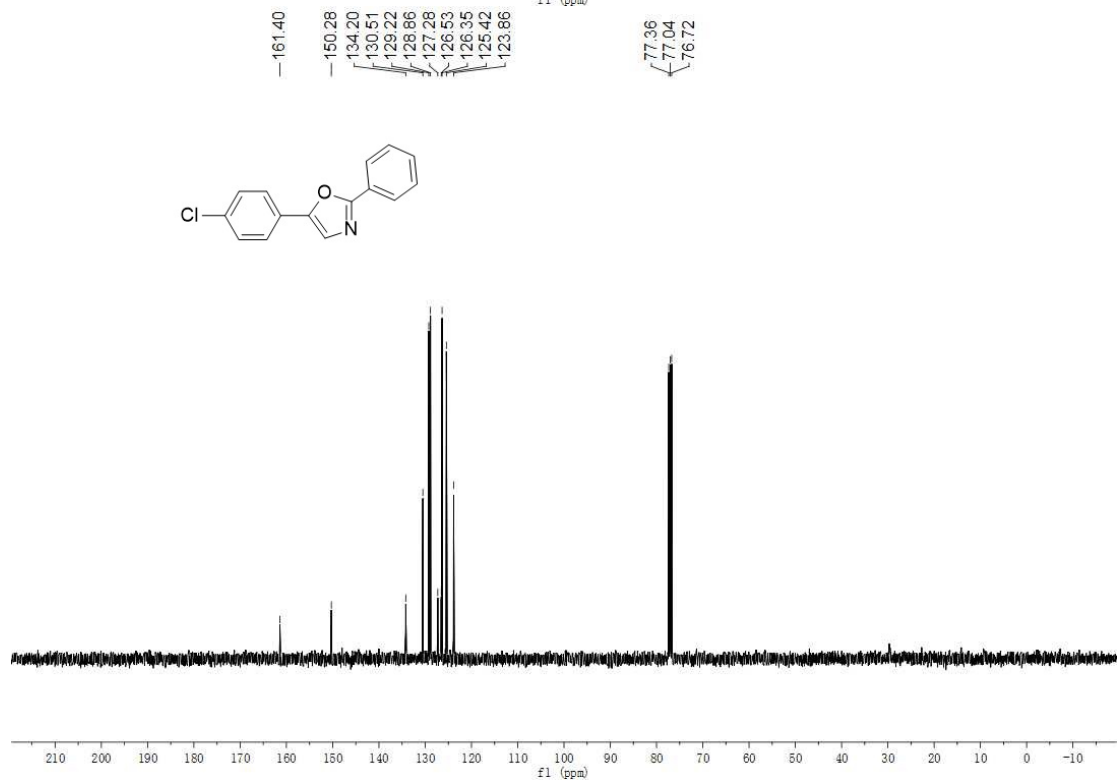

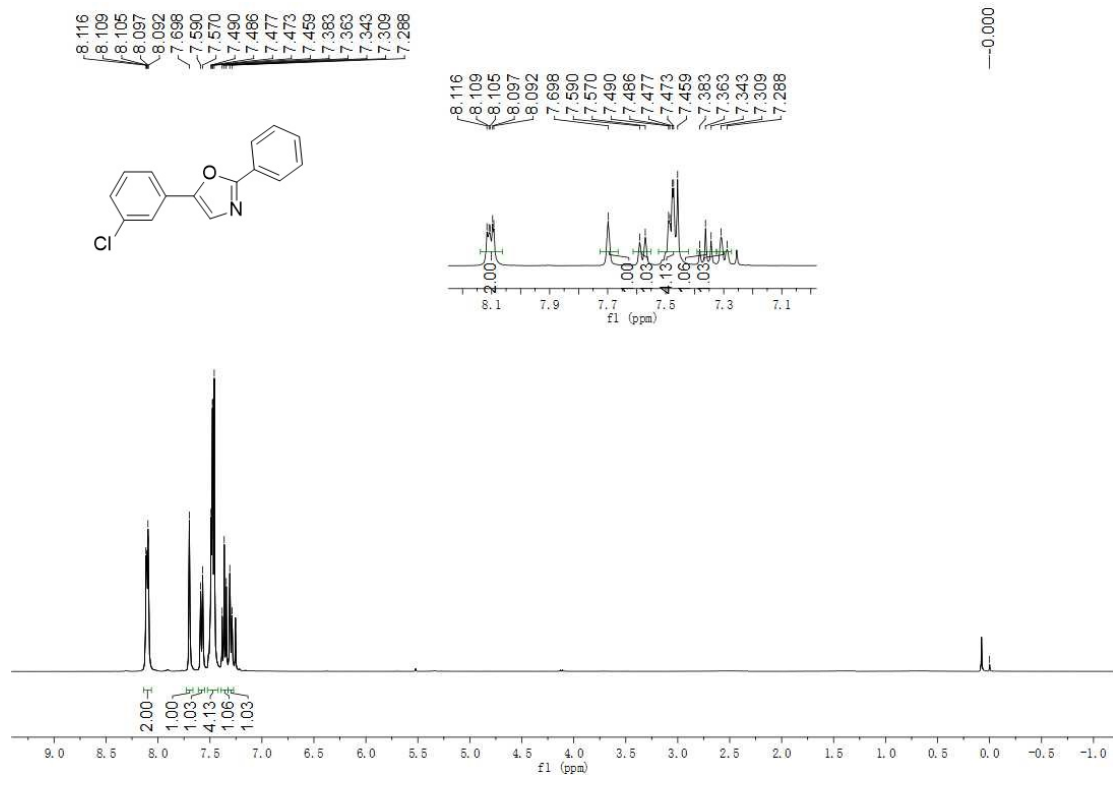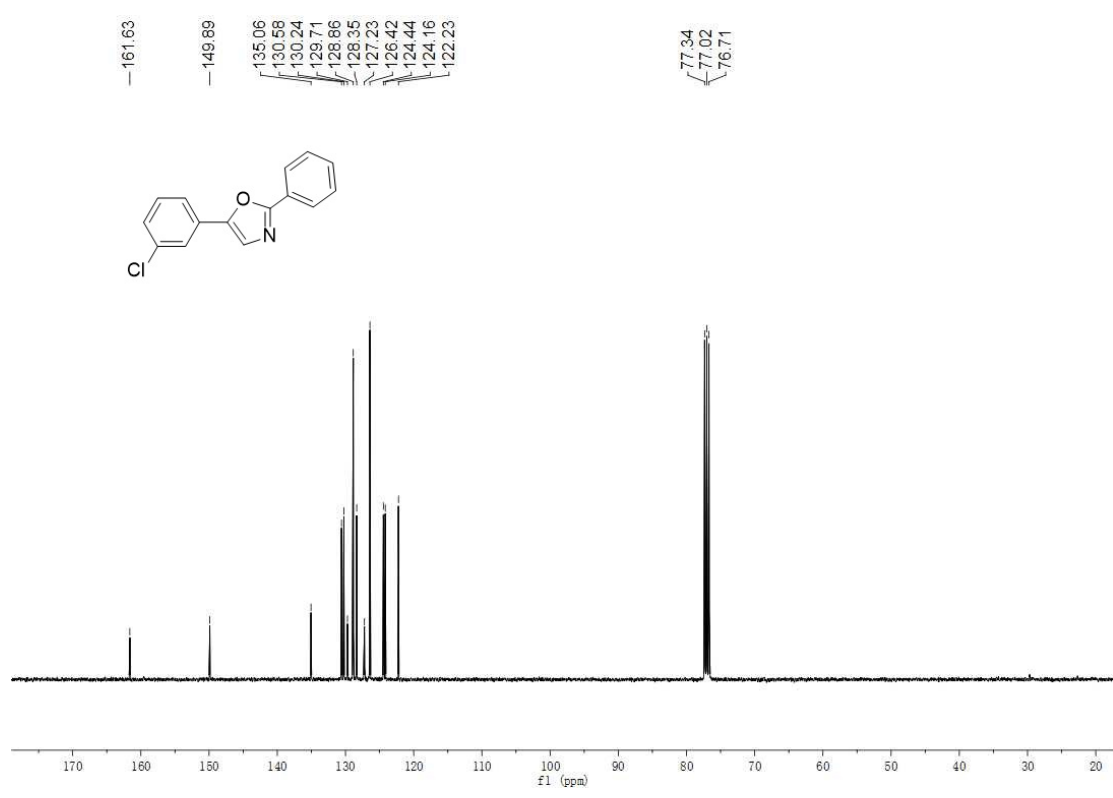



8.136  
8.129  
8.117  
8.112  
7.718  
7.610  
7.590  
7.510  
7.506  
7.497  
7.493  
7.479  
7.403  
7.383  
7.363  
7.329  
7.308

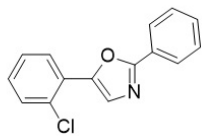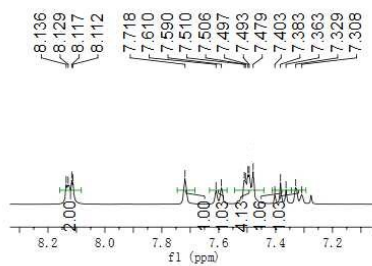

—0.000

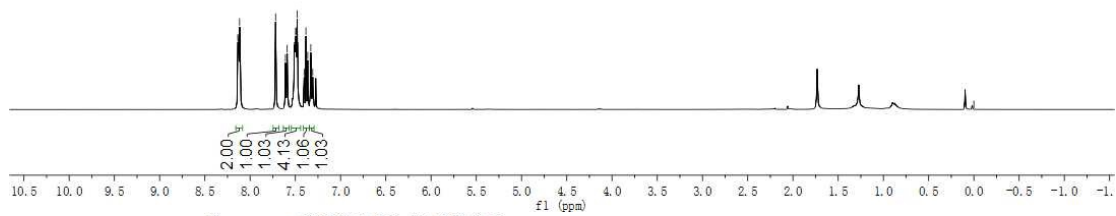

161.65  
149.91  
135.08  
130.60  
130.26  
129.73  
128.88  
128.37  
127.25  
126.44  
124.46  
124.18  
122.25  
77.36  
77.04  
76.73

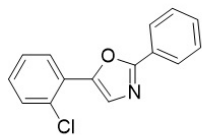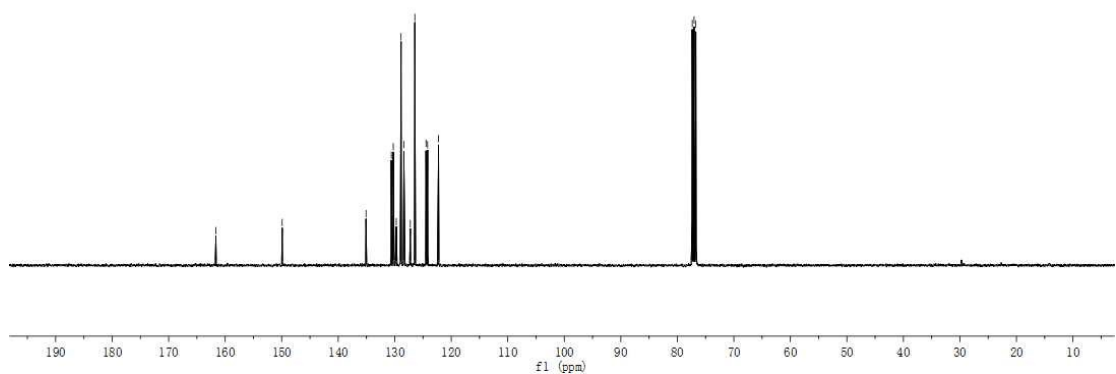

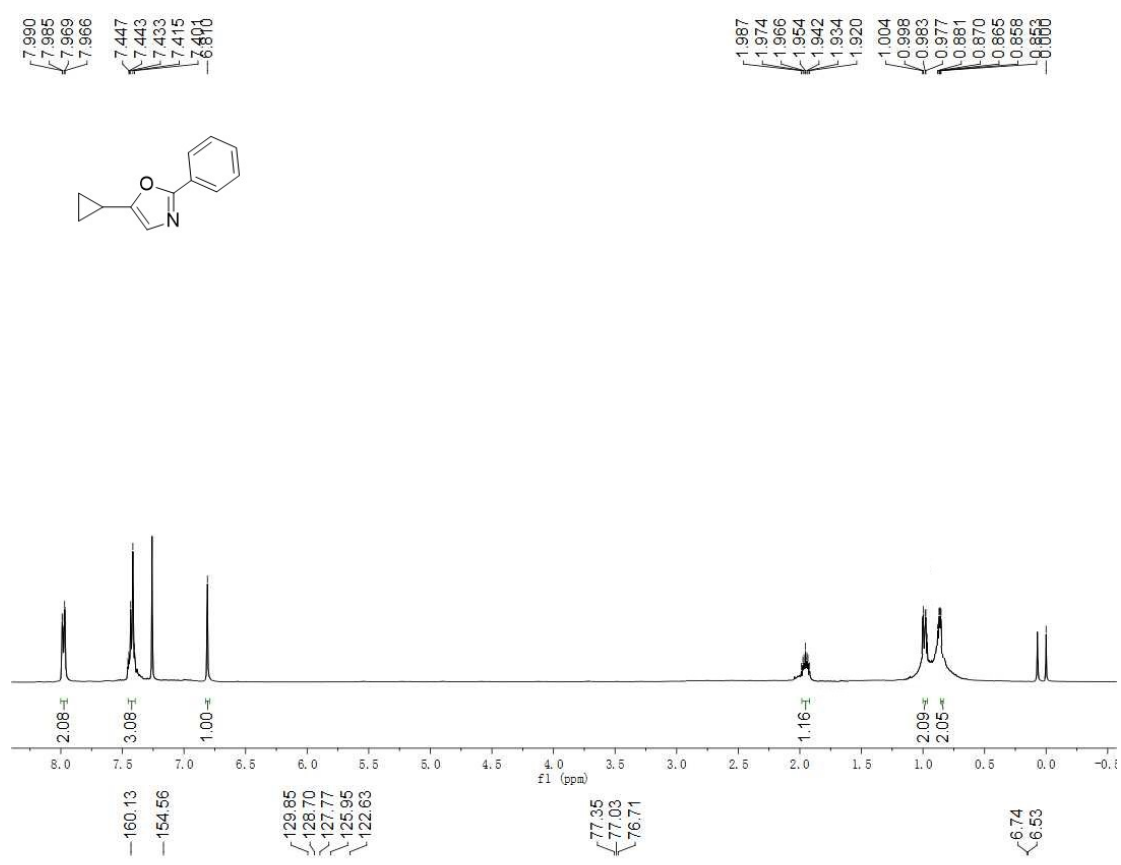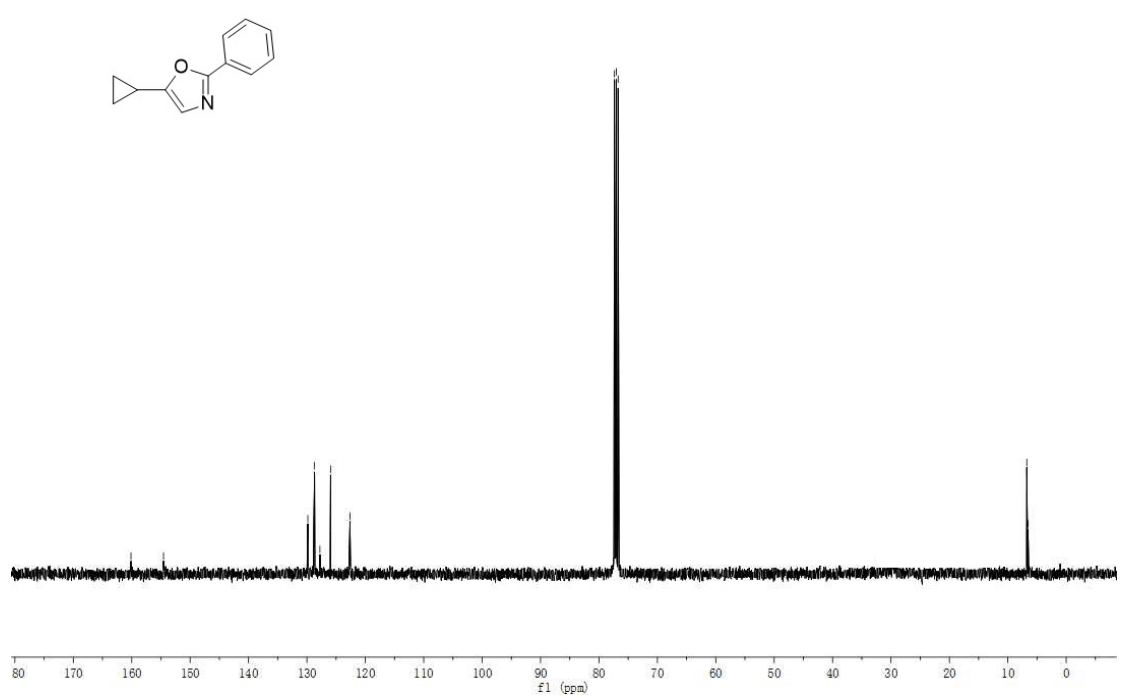

Supplement: d4ra05122j1.pdf [file d4ra05122j1.pdf]
